1 **Biallelic variants in *DAP3* result in reduced assembly of the mitoribosomal small**  
2 **subunit with altered intrinsic and extrinsic apoptosis and a Perrault syndrome-**  
3 **spectrum phenotype**

4  
5 Thomas B. Smith<sup>\*</sup>,<sup>1,2</sup> Robert Kopajtich<sup>\*</sup> <sup>3,4</sup> Leigh A.M. Demain,<sup>1,2</sup> Alessandro Rea,<sup>1,2</sup> Huw B.  
6 Thomas,<sup>1,2</sup> Manuel Schiff,<sup>5,6</sup> Christian Beetz,<sup>7</sup> Shelagh Joss,<sup>8</sup> Gerard S. Conway,<sup>9</sup>  
7 Anju Shukla<sup>10</sup>, Mayuri Yeole<sup>10</sup>, Periyasamy Radhakrishnan<sup>10</sup>, Hatem Azzouz,<sup>11</sup> Amel Ben  
8 Chehida,<sup>11</sup> Monique Elmaleh-Bergès,<sup>12</sup> Ruth I.C. Glasgow,<sup>13</sup> Kyle Thompson,<sup>14</sup> Monika  
9 Oláhová,<sup>14,15</sup> Langping He,<sup>16</sup> Emma M. Jenkinson,<sup>1,2</sup> Amir Jahic,<sup>17</sup> Inna A. Belyantseva,<sup>18</sup>  
10 Melanie Barzik,<sup>18</sup> Jill E. Urquhart,<sup>1,2</sup> James O' Sullivan,<sup>1,2</sup> Simon G. Williams,<sup>1,2</sup> Sanjeev S.  
11 Bhaskar,<sup>1,2</sup> Samantha Carrera,<sup>19</sup> Alexander J.M. Blakes,<sup>1,2</sup> Siddharth Banka,<sup>1,2</sup> Wyatt W.  
12 Yue,<sup>20</sup> Jamie M. Ellingford,<sup>1,2,21</sup> Henry Houlden,<sup>22</sup> DDD Study,<sup>23</sup> Kevin J. Munro,<sup>24</sup> Thomas  
13 B. Friedman,<sup>18</sup> Robert W. Taylor,<sup>14,16</sup> Holger Prokisch<sup>Δ</sup>, <sup>3,4</sup> Raymond T. O'Keefe<sup>Δ</sup>, <sup>1,2</sup>  
14 William G. Newman<sup>Δ</sup> <sup>1,2</sup>

15  
16 1. Division of Evolution, Infection and Genomics, School of Biological Sciences, The  
17 University of Manchester, Manchester, M13 9PL, UK

18 2. Manchester Centre for Genomic Medicine, St Mary's Hospital, The University of  
19 Manchester NHS Foundation Trust, Manchester, M13 9WL, UK

20 3. Institute of Human Genetics, Computational Health Center, Helmholtz Zentrum  
21 München, Neuherberg, 85764, Germany.

22 4. Institute of Human Genetics, School of Medicine, Technical University of Munich,  
23 Munich, 81675, Germany.

24 5. Université Paris Cité, Reference Center for Mitochondrial Disorders (CARAMMEL) and  
25 Reference Center Inborn Error of Metabolism, Department of Pediatrics, Necker-Enfants

26 Malades Hospital, APHP, Filiale G2M, Paris, France

NOTE: This preprint reports new research that has not been certified by peer review and should not be used to guide clinical practice.

- 27 6. Inserm UMR\_S1163, Institut Imagine, Université Paris Cité, Paris, France.
- 28 7. Centogene GmbH, Rostock, Germany.
- 29 8. West of Scotland Centre for Genomic Medicine, Queen Elizabeth University Hospital,  
30 Glasgow G51 4TF, UK.
- 31 9. Institute for Women's Health, University College London, London, United Kingdom.
- 32 10. Department of Medical Genetics, Kasturba Medical College, Manipal, Manipal  
33 Academy of Higher Education, Manipal, India.
- 34 11. Service de pédiatrie et des maladies métaboliques héréditaires, CHU la Rabta, 1007  
35 Jabberi, Tunis, Tunisia.
- 36 12. Service de Radiologie Pédiatrique, Hôpital Robert-Debré, APHP, Paris, France.
- 37 13. Department of Medical Biochemistry and Biophysics, Karolinska Institutet, 171 65,  
38 Stockholm, Sweden
- 39 14. Mitochondrial Research Group, Clinical and Translational Research Institute, Faculty  
40 of Medical Sciences, Newcastle University, Newcastle upon Tyne, NE2 4HH, UK
- 41 15. Department of Applied Sciences, Faculty of Health & Life Sciences, Northumbria  
42 University, Newcastle upon Tyne, UK.
- 43 16. NHS Highly Specialised Service for Rare Mitochondrial Disorders, Newcastle upon  
44 Tyne Hospitals NHS Foundation Trust, Newcastle upon Tyne, NE1 4LP, UK
- 45 17. Institute of Diagnostic Laboratory Medicine, Clinical Chemistry and Pathobiochemistry,  
46 Charité - Universitätsmedizin Berlin, Berlin, Germany.
- 47 18. Laboratory of Molecular Genetics, National Institute on Deafness and Other  
48 Communication Disorders, National Institutes of Health, Bethesda, MD, 20892-3729, USA
- 49 19. Genome Editing Unit, The University of Manchester, Manchester, M13 9PT, UK.
- 50 20. Newcastle University Biosciences Institute, Medical School, Framlington Place,  
51 Newcastle upon Tyne, NE2 4HH, UK
- 52 21. Genomics England, London, UK.

53 22. Department of Molecular Neuroscience, UCL Queen Square Institute of Neurology,  
54 London, United Kingdom.

55 23. Wellcome Trust Sanger Institute, Cambridge, UK.

56 24. Manchester Centre for Audiology and Deafness (ManCAD), School of Health  
57 Sciences, The University of Manchester, Manchester, UK.

58

59 \* **These authors contributed equally.**

60 <sup>Δ</sup> **Senior author.**

61

62 Correspondence to

63 [william.newman@manchester.ac.uk](mailto:william.newman@manchester.ac.uk)

64 [rokeefe@manchester.ac.uk](mailto:rokeefe@manchester.ac.uk)

## 65 **Abstract**

66 The mitoribosome synthesizes 13 protein subunits of the oxidative phosphorylation system  
67 encoded by the mitochondrial genome. The mitoribosome is composed of 12S rRNA, 16S  
68 rRNA and 82 mitoribosomal proteins encoded by nuclear genes. To date, variants in 12  
69 genes encoding mitoribosomal proteins are associated with rare monogenic disorders, and  
70 frequently show combined oxidative phosphorylation deficiency. Here, we describe five  
71 unrelated individuals with biallelic variants in the *DAP3* nuclear gene encoding  
72 mitoribosomal small subunit 29 (MRPS29), with variable clinical presentations ranging  
73 from Perrault syndrome (sensorineural hearing loss and ovarian insufficiency) to an early  
74 childhood neurometabolic phenotype. Assessment of respiratory chain function and  
75 proteomic profiling of fibroblasts from affected individuals demonstrated reduced MRPS29  
76 protein levels, and consequently decreased levels of additional protein components of the  
77 mitoribosomal small subunit, associated with a combined complex I and IV deficiency.  
78 Lentiviral transduction of fibroblasts from affected individuals with wild-type *DAP3* cDNA  
79 increased *DAP3* mRNA expression, and partially rescued protein levels of MRPS7,  
80 MRPS9 and complex I and IV subunits, demonstrating the pathogenicity of the *DAP3*  
81 variants. Protein modelling suggested that *DAP3* disease-associated missense variants  
82 can impact ADP binding, and *in vitro* assays demonstrated *DAP3* variants can  
83 consequently reduce both intrinsic and extrinsic apoptotic sensitivity, *DAP3* thermal  
84 stability and *DAP3* GTPase activity. Our study presents genetic and functional evidence  
85 that biallelic variants in *DAP3* result in a multisystem disorder of combined oxidative  
86 phosphorylation deficiency with pleiotropic presentations, consistent with mitochondrial  
87 dysfunction.

88

## 89 **Keywords**

90 DAP3, mitochondria, mitoribosome, MRPS29, rare disease, Perrault syndrome,  
91 sensorineural hearing loss, ovarian insufficiency, leukodystrophy, mitoribosomal small  
92 subunit

93

## 94 **Introduction**

95 Mitochondrial ribosomes (mitoribosomes) are present in the mitochondria of all eukaryotic  
96 cells. The function of the mitoribosome is to facilitate translation of mitochondrial mRNAs  
97 that exclusively encode components of the oxidative phosphorylation (OXPHOS)  
98 complexes. The mitoribosome consists of a small subunit (SSU) comprised of 30  
99 mitoribosomal proteins (MRPs) and a 12S rRNA that binds mRNA and tRNA to ensure  
100 accurate initiation and decoding, and a large subunit (LSU) comprised of 52 MRPs, 16S  
101 rRNA, and mt-tRNA<sup>Val</sup> that links a nascent polypeptide to the inner mitochondrial  
102 membrane via the OXA1L insertase<sup>1-4</sup>. Formation of the mitoribosome is achieved  
103 through sequential steps. For the LSU, these steps can be divided into early, intermediate  
104 and late, whereas for the SSU these steps are only divided into early and late<sup>5</sup>. Several  
105 human diseases are caused by germline variants in genes encoding mitoribosome  
106 proteins or assembly factors<sup>6</sup> (Table S1). Death-associated protein 3 (DAP3), also known  
107 as mitochondrial ribosomal small subunit 29 (MRPS29), is a GTP-binding protein of the  
108 mitoribosome SSU. The precise function of DAP3 within the mitoribosome remains  
109 unclear, but it is assembled into the SSU at an early stage, interacts extensively with the  
110 12S rRNA and may associate with components of the inner mitochondrial membrane<sup>5,7</sup>.  
111 DAP3 was initially identified as a pro-apoptotic protein<sup>8</sup> involved in interferon- $\gamma$ -, tumor  
112 necrosis factor (TNF)- $\alpha$ - and FAS-induced cell death<sup>9</sup>. DAP3 can also influence  
113 mitochondrial fission by modulating dynamin related protein phosphorylation, with DAP3  
114 depletion resulting in decreased mitochondrial protein synthesis, ATP production and  
115 autophagy<sup>10</sup>. Recently, DAP3 has also been linked to regulation of RNA editing and

116 splicing in the context of cancer <sup>11,12</sup>, further highlighting *DAP3*'s broad range of functions.

117 To date, no *DAP3* variants have been reported in association with monogenic disorders.

118

119 Perrault syndrome is an ultra-rare, autosomal recessive condition characterized by

120 sensorineural hearing loss (SNHL) in both sexes and primary ovarian insufficiency (POI) in

121 46, XX karyotype females (Pallister and Opitz, 1979). Neurological features are present in

122 some affected individuals, often associated with brain white matter changes <sup>13</sup>. As well as

123 being clinically heterogeneous with variable degrees of severity, progression and age of

124 onset of SNHL and POI in affected individuals <sup>14</sup>, Perrault syndrome is remarkably

125 genetically heterogeneous for such a rarely reported condition. To date, biallelic variants in

126 eight genes are definitively associated with Perrault syndrome (Table S2). However,

127 biallelic variants in other genes, including *RMND1*, *PEX6*, *MRPS7*, and *MRPL50* <sup>15–18</sup> have

128 been identified in individuals with some features of Perrault syndrome, with a blended

129 phenotype accounting for some diagnoses <sup>19</sup>.

130

131 Despite this rich genetic architecture, potentially up to 50% of individuals with Perrault

132 syndrome do not have a molecular diagnosis. Similarly, a large fraction of individuals with

133 a suspected mitochondrial disease remain without a molecular diagnosis even after

134 genome sequencing. Here, we present five individuals each with biallelic variants in *DAP3*

135 (Table 1) with accompanying functional data providing evidence that *DAP3* variants result

136 in decreased protein stability, reduced apoptotic sensitivity and impaired mitoribosomal

137 assembly, leading to deficits consistent with mitochondrial disease. This study further

138 underscores the importance of mitoribosome proteins in auditory and ovarian function.

139

## 140 **Material and methods**

### 141 **Recruitment of research subjects**

142 Individuals with clinical features of Perrault syndrome were recruited from the UK,  
143 Tajikistan, Tunisia and India through GeneMatcher <sup>20</sup>, the Deciphering Developmental  
144 Disorders (DDD) project <sup>21</sup> and Centogene (<https://www.centogene.com/>). Informed  
145 consent for DNA analysis was obtained from study participants according to local  
146 institutional ethics requirements. Individuals (and/or their legal guardians) recruited in this  
147 study gave informed consent for their participation. The individual research studies  
148 received ethical approval by the National Health Service Ethics Committee (16/WA/0017  
149 and 10/H0305/83) and The University of Manchester.

### 150 **Whole exome sequencing**

151 WES was performed on DNA extracted from lymphocytes from individual F1:II-1. The  
152 SureSelect Human All Exon V5 Panel (Agilent Technologies) was used for library  
153 preparation and sequencing was performed on the HiSeq 2500 (Illumina) as previously  
154 described <sup>22</sup>. Exome data for affected individuals in families F2-4 were generated as  
155 previously described <sup>21,23,24</sup>. For F5:II-1, the TWIST Human Core Exome Plus exome  
156 capture kit was used, with the Illumina platform utilized for sequencing.

157

### 158 **Identification, amplification and confirmation of the DAP3 fusion product**

159 A 135 Kb deletion encompassing *DAP3* was identified using the ExomeDepth (v1.1.6)  
160 software package <sup>25,26</sup>. Read depth was approximately 0.5 times the aggregated depth  
161 indicating a single allele deletion. The fusion product and breakpoint region were  
162 confirmed in the F1 proband by Sanger sequencing using ABI big Dye v3.1 (Thermo  
163 Fisher Scientific Inc, Waltham, MA, USA) sequencing technology. Primers (Table S3) were  
164 designed to target polymorphisms distinguishing the two segmental duplications where the  
165 deletion breakpoints were situated.

166

### 167 **Maintenance of human dermal fibroblasts**

168 Fibroblasts were cultured in high glucose Dulbecco's Modified Eagle's Medium (Sigma)  
169 with 10% foetal bovine serum (Sigma) and 10 mL/L penicillin-streptomycin (Sigma), at  
170 37°C / 5% CO<sub>2</sub>.

171

### 172 **Fibroblast respiratory chain activity assays**

173 Respiratory chain complex activities were assessed in fibroblasts from affected individuals  
174 F1 and F4, as outlined previously <sup>27</sup>.

175

### 176 **RNA extraction, cDNA synthesis and RT-qPCR**

177 Fibroblasts were seeded into 6-well plates (Corning) and were incubated at 37°C / 5% CO<sub>2</sub>  
178 until approximately 90% confluent. Following one phosphate buffered saline (PBS) wash,  
179 RNA was extracted from cells using TRI-Reagent® (Sigma), according to manufacturer's  
180 instructions. Total RNA was converted to cDNA using the GoScript™ (Promega) Reverse  
181 Transcription System with random hexamers (Thermo Fisher) according to manufacturer's  
182 instructions, normalizing all RNA concentrations to the lowest measured.

183

184 RT-qPCR reactions to assess 12S:16S ratios and mt-DNA gene expression were  
185 performed using 2 µM primer pairs, PowerUp™ SYBR™ Green Master Mix (Thermo  
186 Fisher) and 1 µL template cDNA. Primer sequences are listed in Table S3. The  
187 StepOnePlus Real-Time PCR System (Applied Biosystems) was used to measure  
188 fluorescence, using the Comparative CT reaction cycle programme.  $2^{-\Delta\Delta CT}$  values were  
189 calculated by the accompanying StepOnePlus v2.3 data analysis package, normalizing to  
190 *ACTB* (NM\_001101.5) expression. 12S:16S ratios were calculated by totaling the 12S and  
191 16S RQ values, then dividing the specific RQ value by the total value. All reactions were  
192 run in triplicate in 96-well plates. Data was presented using GraphPad Prism 9 throughout  
193 this study.



## 194 **Expression and purification of recombinant wild-type and variant *DAP3***

195 Purified DNA fragments comprised of truncated *DAP3* (*DAP3* $\Delta$ 46) wild-type or disease-  
196 associated variants from amplified cDNA were inserted into the pMAL-c4X plasmid (New  
197 England Biolabs) at the multiple cloning site downstream of maltose binding protein  
198 (MBP), alongside a C-terminal 6x His-tag using NEBuilder<sup>®</sup> HiFi DNA Assembly Master  
199 Mix (New England Biolabs) according to the manufacturer's instructions. A pMAL-c4x  
200 vector containing MBP fused to only the 6x His-tag was also produced for a negative  
201 control. All primer sequences for site-directed mutagenesis and mutagenic  
202 oligonucleotides are listed in Tables S3-S4. Following confirmation via Sanger sequencing  
203 (Eurofins Genomics), plasmids were transformed into Rosetta 2 (DE3) *E. coli* cells  
204 (Novagen) and cultured in Overnight Express TB medium (Novagen) at 19°C for 72 hours.  
205 Pellets were resuspended in lysis/wash buffer comprised of 20 mM Tris-Cl pH 7.4, 150  
206 mM NaCl, 0.1 mM DTT, 20 mM imidazole (Sigma) and 15% glycerol. All purified proteins  
207 were captured and separated by affinity chromatography utilizing the 6x His-tag. His-  
208 tagged proteins were then eluted in lysis/wash buffer containing 250 mM imidazole.  
209 Selected fractions were then dialyzed overnight at 4°C in 20 mM Tris-HCl pH 8, 200 mM  
210 NaCl, 2 mM DTT and 15% glycerol. Proteins were then centrifuged at 17,000 x g for 10  
211 minutes at 4°C, and the supernatants were frozen at -80°C.

212

## 213 **GTPase assays**

214 GTPase assays were conducted using the GTPase-Glo<sup>™</sup> Assay (Promega) in white  
215 opaque 96-well plates (Greiner Bio-One) in accordance with the manufacturer's guidelines.  
216 A final concentration of 5  $\mu$ M *DAP3* protein, 5  $\mu$ M GTP and 1 mM DTT was selected for  
217 use in the GTPase reaction, which ran for one hour at room temperature. Luminescence of  
218 residual GTP converted to ATP was measured using the BioTek Synergy H1 microplate  
219 reader (Agilent) 10 minutes after addition of detection buffer, with reactions conducted in

220 duplicate over three independent assays. Residual GTP was calculated as a percentage  
221 using a no protein control, with an MBP-His protein control ran in parallel to ensure  
222 observed GTPase activity was DAP3-specific. Data was collected using Gen5 v2.07  
223 software (Agilent).

224

### 225 **Proteomic analysis**

226 Fibroblasts from F1:II-1 and F4:II-1 were processed and analyzed through an established  
227 proteomics pipeline to quantify the protein levels of both DAP3, and components of the  
228 mitoribosome and respiratory chain complexes. Two parameters of the protocol previously  
229 described<sup>28</sup> have been modified: Peptide fractionation was carried out using high pH  
230 reverse phase instead of trimodal mixed-mode chromatography and TMT-labeling was  
231 carried using TMT 11-plex instead of TMT 10-plex reagent. For data normalization,  
232 quantification and detection of aberrant protein expression, a denoising autoencoder  
233 based approach OUTRIDER2 was employed (termed PROTRIDER in Kopajtich *et al.*  
234 2021).

235

### 236 **Apoptosis assays**

237 Control and affected individual fibroblasts were seeded in opaque, white 96 well plates  
238 (Greiner Bio-One) at a density of 15,000 cells per well and incubated for 24 hours at 37°C  
239 / 5% CO<sub>2</sub>. Cells were treated with either 1 µM staurosporine (Cayman) for 4.5 hours to  
240 induce the intrinsic apoptotic pathway, 0.05 µg/mL or 0.5 µg/mL TNF-α (Sigma) in  
241 combination with 10 µg/mL cycloheximide (Cayman) for 24 hours to induce the extrinsic  
242 apoptosis pathway, or with suitable controls (0.01% DMSO and 10 µg/mL cycloheximide).  
243 Apoptotic activity was quantified using the Caspase-Glo® 3/7 Assay System (Promega),  
244 as per manufacturer's instructions.

245

## 246 **Thermal shift assay (TSA)**

247 TSA was performed using the Protein Thermal Shift™ Dye Kit (Fisher Scientific) as per the  
248 manufacturer's instructions in 96 well plates using the StepOnePlus Real-Time PCR  
249 System. 1 µg of recombinant MBP-DAP3 protein was subjected to melt-curve analysis in  
250 triplicate, progressing from 25°C to 90°C with a 1% temperature ramp rate. Melting  
251 temperature ( $T_m$ ) was derived by plotting melt curves of temperature against fluorescence  
252 intensity, selecting the temperature at which peak fluorescent intensity was detected.

253

## 254 **Lentiviral transduction of *DAP3* cDNA**

255 A third-generation lentiviral construct was assembled using VectorBuilder, inserting full-  
256 length *DAP3* cDNA upstream of T2A:EGFP under the control of an EF1α short form (EFS)  
257 promoter. Following confirmatory Sanger sequencing and lentiviral packaging, fibroblasts  
258 from affected individuals and controls were seeded in 12-well plates at a density of 40,000  
259 cells per well for RNA extraction, or into T25 flasks (Corning) at a density of 200,000 cells  
260 per flask for immunoblotting. Cells were immediately transduced in combination with 5  
261 µg/mL Polybrene (Sigma), then incubated for 24 hours at 37°C and 5% CO<sub>2</sub>. Cells were  
262 washed three times with PBS, then growth media was replaced. After 72 hours post-  
263 transduction, cells were washed 3 times with PBS and processed as required. Subsequent  
264 RNA extraction, cDNA synthesis and qPCR analysis were conducted as described above.

265

## 266 **SDS-PAGE and immunoblotting**

267 Cells were pelleted and lysed in 50 µl Pierce™ IP Lysis Buffer (Thermo Scientific)  
268 supplemented with 50x protease inhibitor cocktail (Promega) on ice, then agitated for 30  
269 minutes at 4°C and centrifuged at 13,000 rpm for 15 minutes. Samples were mixed 1:1  
270 with 2X SDS-PAGE sample buffer and heated to linearise protein, then ran on a 4-12%  
271 polyacrylamide gel made in-house at 180V for 60 minutes alongside the Precision Plus

272 Protein Dual Color Standards (Bio-Rad) ladder. Proteins were transferred onto a 0.45µm  
273 PVDF blotting membrane (GE Healthcare) using a Trans-Blot Semi-Dry Transfer Cell  
274 System (Bio-Rad) for 30 minutes at 20V. The membrane was washed with 1x TBS-Tween  
275 and blocked with 5% milk for 1 hour with agitation. Primary antibodies specific to MRPS7  
276 (Abcam, ab224442), MRPS9 (Abcam, ab187906), the five antibodies provided in the Total  
277 OXPHOS Human WB Antibody Cocktail (ATP5A, UQCRC2, SDHB, COXII, and NDUFB8)  
278 (Abcam, ab110411) and beta-actin (ProteinTech; 20536-1-AP, 66009-1-Ig) were incubated  
279 overnight at 4°C in block with agitation. Dilutions were 1:200 (MRPS7, MRPS9), 1:500  
280 (Total OXPHOS) and 1:5000 (beta-actin) respectively. After washing, secondary  
281 antibodies were incubated with the membrane for 1 hour at 1:10,000, and were as follows:  
282 IRDye® 800CW Goat anti-Rabbit IgG (LI-COR, 926-32211) and IRDye® 680RD Goat anti-  
283 Mouse IgG antibody (LI-COR, 926-68070). Blots were washed in TBS-Tween and  
284 visualised with the LICOR Odyssey FC imaging system using the 600, 700 and 800  
285 channels. Quantification was achieved using LICOR Image Studio and beta-actin was  
286 used to normalise band intensities.

287

### 288 **DAP3 localisation in mouse organ of Corti**

289 The NIH Animal Care and Use Committee approved protocol #1263-15 to T.B.F. for  
290 mouse use. C57Bl/6J mice at postnatal day 3 (P3), P10, and P14 were euthanized, the  
291 cochleae were removed and fixed with 4% paraformaldehyde in PBS for 2 hours at room  
292 temperature (RT). The samples were microdissected, and the organ of Corti was  
293 permeabilized with 0.5% Triton-X100 in PBS for 30 minutes followed by three 10 minute  
294 washes with 1X PBS. Nonspecific binding sites were blocked with 5% normal goat serum  
295 and 2% BSA in PBS for 1 hour at RT. Samples were incubated for 2 hours at RT with  
296 primary antibodies (Table S5) in blocking solution, followed by several rinses with PBS.  
297 Then, samples were incubated with secondary antibodies (Table S5) for 30 minutes at RT,

298 washed several times with PBS, mounted with ProLongGold Antifade staining reagent with  
299 DAPI (Molecular Probes, Invitrogen, Carlsbad, CA, USA) and examined using a LSM780  
300 confocal microscope (Zeiss Microimaging Inc, Oberkochen, Germany) equipped with 63X,  
301 1.4 N.A. objective.

### 302 **Mouse organ of Corti Helios Gene Gun transfection**

303 Inner ear sensory epithelium cultures were prepared from P1 C57Bl/6J mouse organ of  
304 Corti and transfected with plasmid DNA using the gene gun method as previously  
305 described<sup>29</sup>. Briefly, the organ of Corti spiral was dissected in Leibowitz cell culture  
306 medium (Invitrogen, Carlsbad, CA, USA) and attached to a glass-bottom Petri dish  
307 (MatTek, Ashland, MA, USA), coated with rat tail collagen and maintained at 37°C and 5%  
308 CO<sub>2</sub> in DMEM supplemented with 7% FBS for 1–3 days. Cultures were transfected using a  
309 Helios gene gun (Bio-Rad, Hercules, CA, USA). Gold particles of 1.0 µm diameter (Bio-  
310 Rad, Hercules, CA, USA) were coated with DAP3-EGFP plasmid DNA at a ratio of 2 µg of  
311 plasmid DNA to 1 mg of gold particles and precipitated onto Tefzel tubing, which was cut  
312 into individual cartridges containing approximately 1 µg of plasmid DNA. Samples were  
313 bombarded with gold particles from one cartridge per culture by using 110-120 psi of  
314 helium. After an additional 8 hours to 4 days in culture, samples were fixed in 4%  
315 paraformaldehyde and stained using the same method as the tissue samples above.

316

### 317 **Statistical analysis**

318 Statistical analyses were accomplished using GraphPad Prism 9 (GraphPad) software,  
319 performing one-way or two-way ANOVAs using either Dunnett's or Tukey's multiple  
320 comparisons tests where appropriate, as indicated in the figure legends. Statistical  
321 significance was defined as a *p*-value < 0.05.

322

323 **Results**

324 Full phenotypic details are available from the authors on request.

325 Family F1 is a non-consanguineous white European family (Figure 1A) with an affected  
326 female proband who was diagnosed with bilateral, profound SNHL in early childhood  
327 (Figure S1A). She presented with primary amenorrhea leading to a diagnosis of Perrault  
328 syndrome. Otherwise, she had normal development and intellect. She had a successful  
329 unilateral cochlear implant as an adult. The mother is unaffected, whilst the father is  
330 deceased from an unrelated condition.

331

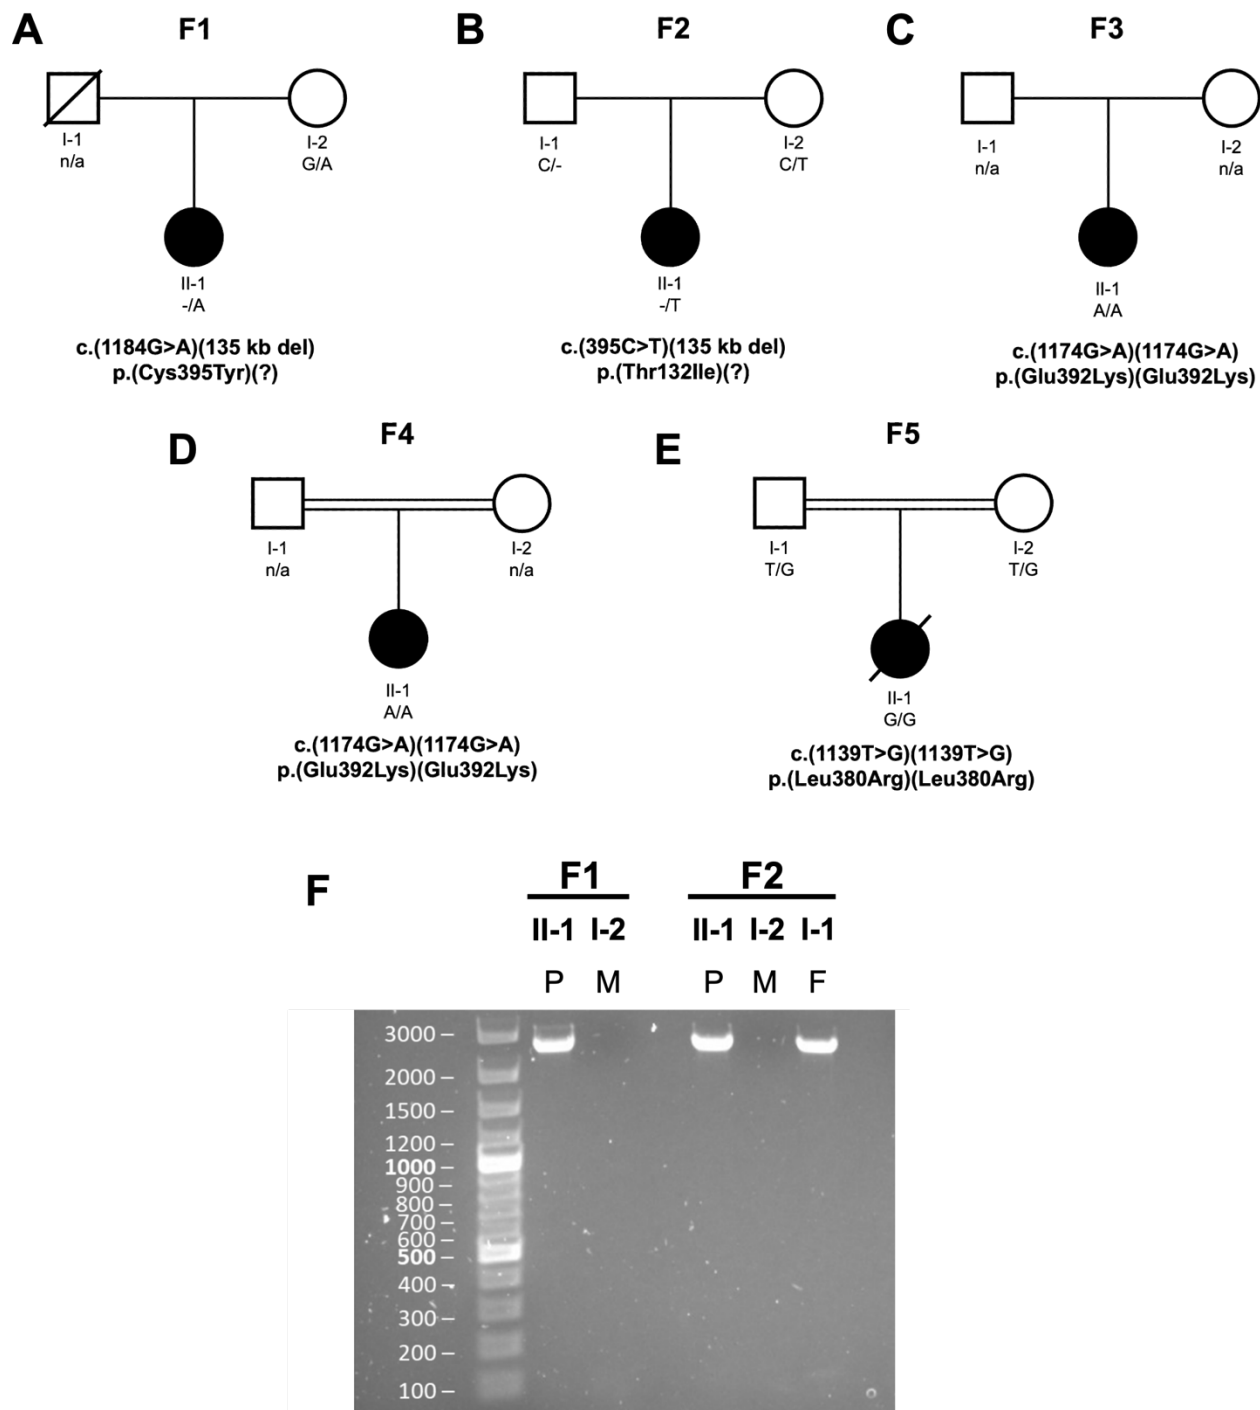

332

333 **Figure 1: Family pedigrees and characterization of the *DAP3* deletion fusion product**  
 334 **present in F1 and F2.**

335 (A-E) Pedigrees for the five families, with known segregation and variant details listed. All  
 336 variants are annotated against the *DAP3* reference sequence NM\_004632.4.

337 (F) PCR analysis of F1 and F2 DNA using gel electrophoresis to detect a fusion product  
 338 for the 135 kb deletion. P = proband, M = mother, F = father.

339

340 WES initially uncovered no putative pathogenic variants in known Perrault syndrome  
341 genes, but additional filtering revealed the F1 proband was compound heterozygous for  
342 the missense variant *DAP3* (NM\_004632.4:c.1184G>A, p.(Cys395Tyr)), *in trans* to a 135  
343 kb deletion identified with multiplex ligation-dependent probe amplification (MPLA).  
344 Breakpoints were established to recombine between Chr1(GRCh38):g.155641696-  
345 155777755, which encompasses *DAP3* as well as *YY1AP1*, *GON4L* and *MSTO2P*. WES  
346 data revealed no rare variants in these other genes. The *DAP3* variant p.(Cys395Tyr) was  
347 confirmed as heterozygous in the unaffected mother by Sanger sequencing, however it is  
348 unknown whether the deletion was a *de novo* event or inherited paternally.

349

350 Family F2 is a non-consanguineous white European family (Figure 1B), ascertained  
351 through the Deciphering Developmental Disorders (DDD) study <sup>21</sup>. The proband was  
352 diagnosed with bilateral SNHL in early childhood. As an adult she had bilateral cochlear  
353 implants (Figure S1B). She presented with primary amenorrhea (Figure S1C). In early  
354 childhood, she experienced recurrent episodes of ketosis, lactic acidosis and  
355 hypoglycemia and has mild intellectual disability. As an adult her brain MRI was normal.

356

357 Trio WES data in F2 identified a maternally inherited *DAP3* (NM\_004632.4:c.395C>T  
358 p.(Thr132Ile)) missense variant *in trans* to a paternally inherited 135 kb deletion. A PCR  
359 fusion product of the same size as in the F1 proband was detected in the F2 proband, and  
360 her unaffected father (Figure 1F). The repetitive nature of this chromosomal region made it  
361 impossible to confirm whether the breakpoints are identical in both families.



|                                              | <b>Proband F1</b>                                              | <b>Proband F2</b>                                   | <b>Proband F3</b>         | <b>Proband F4</b>         | <b>Proband F5</b>         |
|----------------------------------------------|----------------------------------------------------------------|-----------------------------------------------------|---------------------------|---------------------------|---------------------------|
| <b>Sex</b>                                   | Female                                                         | Female                                              | Female                    | Female                    | Female                    |
| <b>Genotype</b><br>(NM_004632.4)             | c.1184G>A;<br>135 kb del                                       | c.395C>T;<br>135 kb del                             | c.1174G>A;<br>1174G>A     | c.1174G>A;<br>1174G>A     | c.1139T>G;<br>1139T>G     |
| <b>Amino acid change</b><br>(NP_001186778.1) | p.Cys395Tyr;<br>?                                              | p.Thr132Ile;<br>?                                   | p.Glu392Lys;<br>Glu392Lys | p.Glu392Lys;<br>Glu392Lys | p.Leu380Arg;<br>Leu380Arg |
| <b>Karyotype</b>                             | 46, XX                                                         | 46, XX                                              | N/A                       | N/A                       | N/A                       |
| <b>Consanguinity</b>                         | -                                                              | -                                                   | N/A                       | +                         | +                         |
| <b>Bilateral sensorineural hearing loss</b>  | +                                                              | +                                                   | +                         | +                         | N/A                       |
| <b>Severity</b>                              | Profound                                                       | Profound                                            | N/A                       | Profound                  | N/A                       |
| <b>Treatment</b>                             | Unilateral cochlear implant, previously bilateral hearing aids | Bilateral hearing aids; bilateral cochlear implants | N/A                       | Hearing aids              | N/A                       |
| <b>Primary ovarian insufficiency</b>         | +                                                              | +                                                   | +                         | N/A                       | N/A                       |
| <b>Presentation</b>                          | Primary amenorrhea                                             | Primary amenorrhea                                  | Primary amenorrhea        | N/A                       | N/A                       |
| <b>Lactic acidosis</b>                       | -                                                              | + (childhood)                                       | N/A                       | + (childhood)             | +                         |
| <b>Hypoglycemia</b>                          | -                                                              | + (childhood)                                       | N/A                       | N/A                       | N/A                       |

|                                  | Proband F1 | Proband F2 | Proband F3 | Proband F4                  | Proband F5 |
|----------------------------------|------------|------------|------------|-----------------------------|------------|
| <b>Brain MRI</b>                 | Normal     | Normal     | N/A        | Diffuse leukoencephalopathy | Normal     |
| <b>Epilepsy</b>                  | -          | -          | N/A        | +                           | +          |
| <b>Intellectual disability</b>   | -          | Mild       | Mild       | Severe                      | -          |
| <b>Renal dysfunction</b>         | -          | -          | -          | Proximal tubulopathy        | -          |
| <b>Retinopathy</b>               | -          | -          | -          | +                           | -          |
| <b>Hepatomegaly</b>              | -          | -          | -          | -                           | +          |
| <b>(Transient) liver failure</b> | -          | -          | -          | +                           | +          |
| <b>Height</b>                    | 148 cm     | N/A        | N/A        | N/A                         | 66 cm      |

363

364 Table 1: **Phenotypic summary of individuals with *DAP3* variants identified in this study.**

365 Blue – categories linked to SNHL, red – categories linked to POI. N/A = not available.

366

367

368

369 Family F3 was identified through Centogene. The proband is a young woman from Central  
370 Asia (Figure 1C). She presented with bilateral SNHL of unknown severity, primary  
371 amenorrhea, mild intellectual disability and developmental delay. No further clinical  
372 information is available for this family. WES revealed the proband was homozygous for the  
373 *DAP3* (NM\_004632.4: c.1174G>A, p.(Glu392Lys)) missense variant.

374

375 Family F4 is a consanguineous family of North African ancestry (Figure 1D). The affected  
376 proband is a girl who presented in early childhood with neurological impairment following a  
377 febrile infection with seizures. Brain MRI revealed diffuse leukoencephalopathy, with a  
378 lactate peak on spectroscopy (Figure S2). She had profound SNHL, transient liver failure  
379 and proximal tubulopathy. Electroretinogram studies revealed retinopathy. CSF and blood  
380 lactate levels were 4.5 mmol/L and 5-7 mmol/L respectively (normal ranges 1.1 – 2.4 and  
381  $\leq 2$ mmol/L), with an increased lactate/pyruvate ratio. Respiratory chain analysis activity  
382 testing on muscle cells revealed a complex IV deficiency, with borderline complex I  
383 deficiency. She has severe intellectual disability. The proband was homozygous for the  
384 *DAP3* (NM\_004632.4:c.1174G>A, p.(Glu392Lys)) missense variant.

385

386 Finally, family F5 is a consanguineous family from the Indian sub-continent with a family  
387 history of neonatal and infant mortality (Figure 1E). The affected individual presented in  
388 early childhood with fever, vomiting and lethargy. Further testing revealed  
389 hepatosplenomegaly and lactic acidemia. Brain MRI was unremarkable. No hearing  
390 evaluation was completed. The provisional diagnosis was mitochondrial disorder with  
391 hepatic failure, and she died shortly after presentation. WES revealed the proband was  
392 homozygous for the *DAP3* (NM\_004632.4:c.1139T>G, p.(Leu380Arg)) missense variant.

393

394 All affected DAP3 residues are well-conserved; representing 65% (p.Thr132Ile), 91%  
395 (p.Leu380Arg), 66% (p.Glu392Lys), and 73% (p.Cys395Tyr) of the respective amino acid  
396 positions across 300 orthologs using ConSurf (Figure 2A). All substituted amino acids are  
397 also not present in any orthologs <sup>30</sup>. Multiple *in silico* analyses predict these variants to be  
398 pathogenic or deleterious (Table S6). The four missense variants are either absent or have  
399 extremely low allele frequencies in the gnomAD v4.0 dataset (Table S7) <sup>31</sup>, in further  
400 support of pathogenicity.

401



408 reference sequence used for these species are listed accordingly: *H. sapiens*:  
409 NP\_001186778.1; *P. troglodytes*: XP\_016802675.2; *C. familiaris*: XP\_038527847.1; *B.*  
410 *taurus*: NP\_001106765.1; *R. norvegicus*: NP\_001011950.2; *M. musculus*:  
411 NP\_001158005.1; *G. gallus*: XP\_040546712.1; *X. tropicalis*: NP\_001016002.1; *D. rerio*:  
412 NP\_001092207.1; *D. melanogaster*: NP\_523811.1; *C. elegans*: AAD20727.1.

413 (B) Overview of *DAP3* variant locations, with additional regions or domains of interest for  
414 additional context. MTS – mitochondrial targeting sequence, NR – nuclear receptor, CAYL  
415 – cysteine alanine tyrosine leucine (final 4 residues at the *DAP3* C-terminus).

416 (C) Cryo-EM structure of human mitochondrial ribosome small subunit at 2.40 Å resolution  
417 (PDB id: 7P2E), highlighting *DAP3* (green), *MRPS7* (rose) and *MRPS9* (yellow) subunits.

418 (D) Cartoon representation of *DAP3* bound with GDP and ADP.

419 (E) ADP binding site of *DAP3* in proximity to the four sites of mutation (orange sticks).

420

421 We next inspected the site of variants at the protein level (Figure 2B), based on the  
422 recently determined structure of human mitoribosome SSU<sup>33</sup>. *DAP3/MRPS29* is localized  
423 in the head region of SSU (Figure 2C), close to the interface with the LSU. Three affected  
424 residues sit around a nucleotide binding site, currently believed to bind ATP (Figure 2D).  
425 Threonine 132 sits within a Walker A motif (**GEKGT**<sub>132</sub>**GKT**), which is commonly  
426 associated with ATP or GTP/GDP binding<sup>34</sup>. Cysteine 395 is located within a putative  
427 prenylation site (CAYL) at the *DAP3* C-terminus<sup>35</sup> and is close to the interface with  
428 *MRPS7*, another mitoribosomal protein in which pathogenic variants have been associated  
429 with primary ovarian insufficiency<sup>36,37</sup> (Figure 2E). Glutamic acid 392 is located upstream  
430 of this prenylation site and is predicted to interact directly with ATP<sup>36</sup>. Leucine 380  
431 localizes in an  $\alpha$ -helix that packs against *MRPS7* and *MRPS9*.

432

433 To gain a deeper insight into the role of *DAP3* in the inner ear, we used

434 immunofluorescence to assess DAP3 localization within the mouse organ of Corti.  
435 Endogenous DAP3 was identified within murine organ of Corti but was irregularly  
436 distributed in hair cells before and after the onset of hearing, with higher expression  
437 observed in likely damaged cells, sometimes with misshapen nuclei (Figure S3A).  
438 Exogenous DAP3 tagged with EGFP was then transfected into the mouse organ of Corti  
439 and vestibular sensory epithelium using a Helios gene gun, to test how overexpression  
440 affected the inner ear sensory hair cells. Overexpression instigated co-localization of  
441 DAP3-EGFP with TOM20 in hair cells and diffuse staining within the cell body (Figure  
442 S3B), however, there was no discernible increase in cell death following DAP3  
443 overexpression, indicating compensatory mechanisms may prevent unwarranted  
444 alterations to mitochondrial and apoptotic functions in the inner ear. We also  
445 immunostained transfected inner ear epithelial explants with DAP3 antibodies and showed  
446 that antibody signal was increased in transfected cells only (Figure S3C), while remained  
447 practically undetectable in non-transfected cells, indicating the specificity of the antibody to  
448 DAP3 protein while pointing to very low levels of DAP3 in wild-type hair cells under normal  
449 conditions.

450  
451 To investigate the pathogenicity of the *DAP3* variants, we characterized dermal fibroblasts  
452 obtained from the affected individuals in families F1 and F4. We assessed the respiratory  
453 chain complex activities of these fibroblasts in comparison to eight healthy control  
454 fibroblasts (Figure 3A). Interestingly, F1:II-1 proband fibroblasts exhibited a mild  
455 mitochondrial respiratory chain defect, with a clear decline in complex IV activity compared  
456 to control reference ranges. F4:II-1 fibroblasts exhibited a heightened respiratory chain  
457 defect, with a reduction in both complex I and complex IV activities (Tables S8-9). The F4  
458 CI:CII ratio of activities was also decreased, indicative of a generalized disorder of  
459 mitochondrial translation.

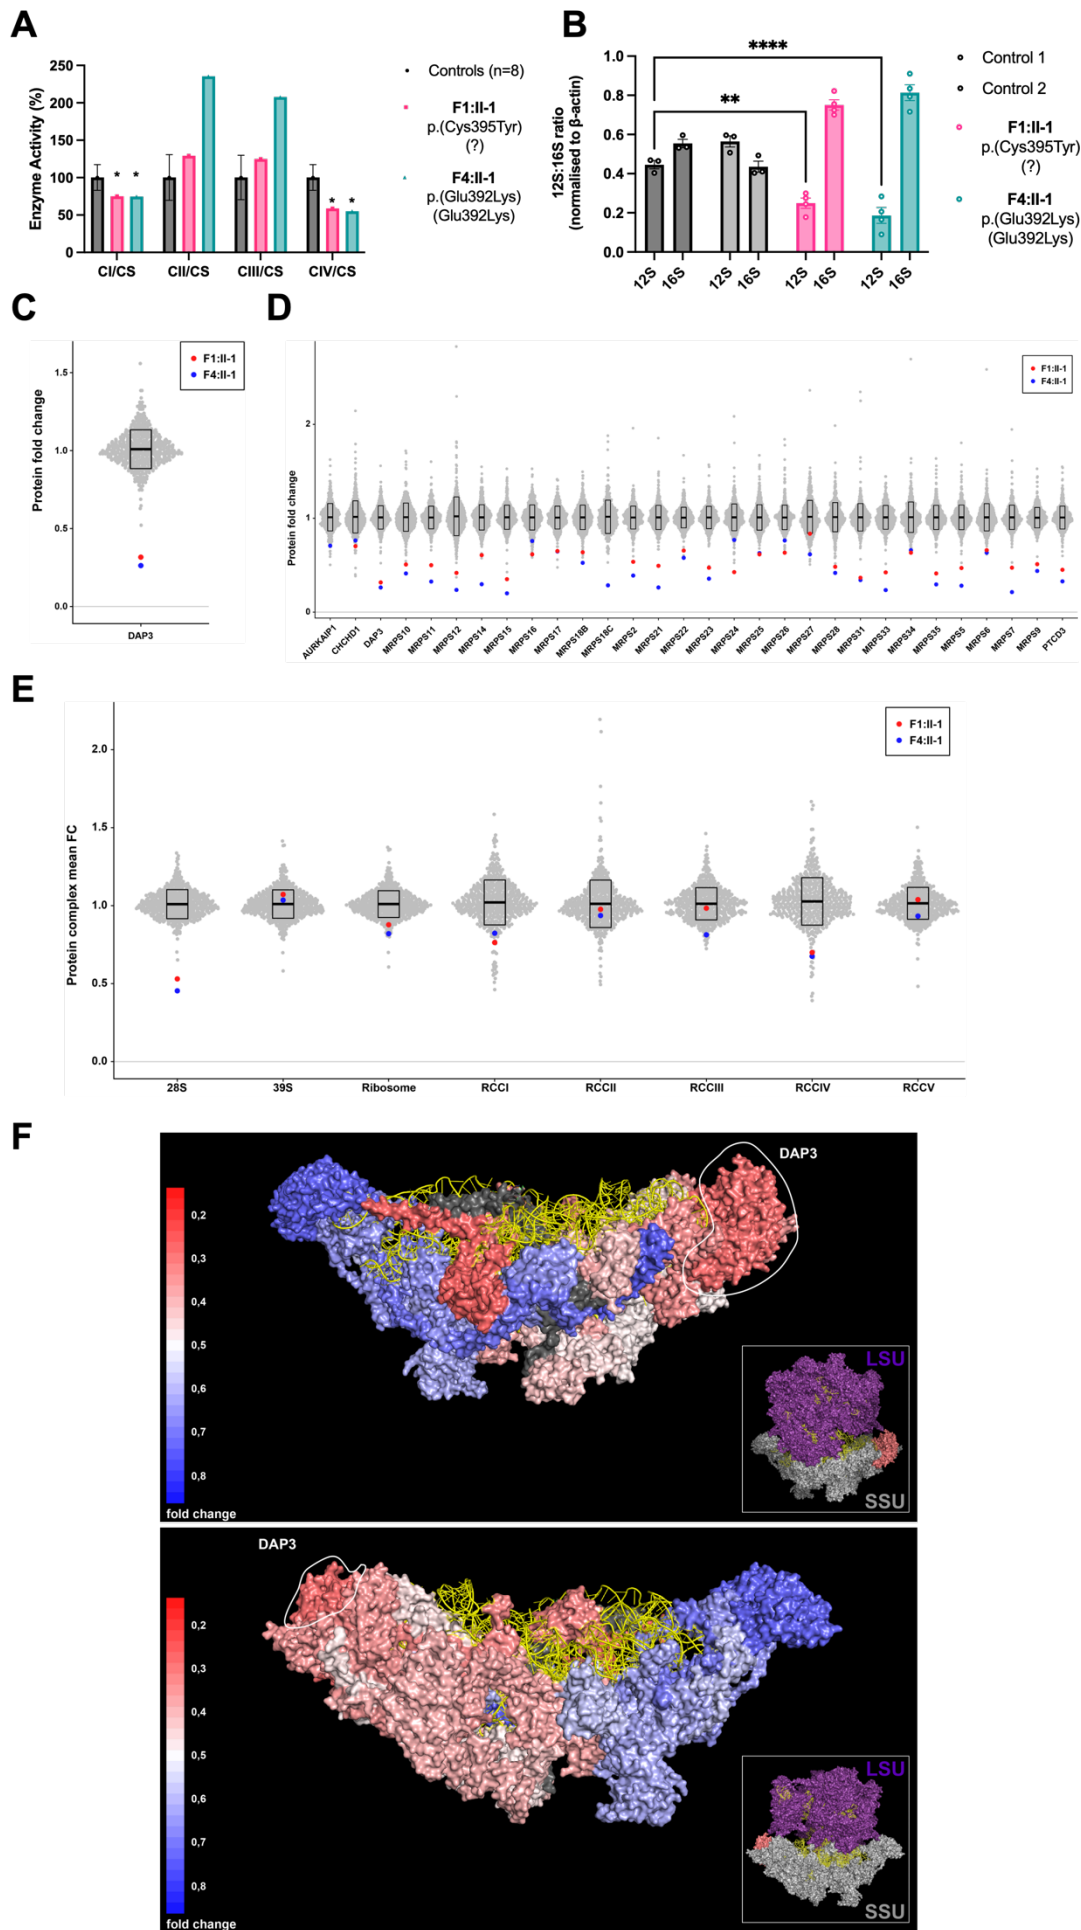



461 **Figure 3: Functional and proteomic analysis of F1 and F4 proband fibroblasts reveal**  
462 ***DAP3* variants induce mitochondrial respiratory chain defects and decreased**  
463 **expression levels of small mitoribosomal subunit and OXPHOS components.**

464 (A) Mitochondrial respiratory chain enzyme activities in control (black), F1:II-1 (pink) and  
465 F4:II-1 (blue) fibroblast samples. Mean enzyme activities in control fibroblasts (n = 8) are  
466 set at 100%. Error bars represent standard deviation between the controls.

467 \* indicates enzyme activity is beyond control standard deviation values.

468 (B) *MT-RNR1* (12S) and *MT-RNR2* (16S) expression levels in fibroblast cDNA. Data  
469 expressed as a ratio using relative quantification (RQ) values. Error bars represent the  
470 SEM. N = 3-4, \*\*p < 0.01, \*\*\*\*p < 0.0001, two-way ANOVA with Tukey's multiple  
471 comparisons test, comparing 12S RQ value of controls to affected individuals.

472 (C) *DAP3* protein levels in affected individual fibroblasts expressed as protein fold change  
473 compared to the mean of 512 fibroblast samples.

474 (D) Protein fold change of all components of the mitoribosomal SSU in affected individual  
475 fibroblasts, compared to 512 controls.

476 (E) Grouped mean fold change of all proteins comprising mitoribosome subunits, whole  
477 mitoribosome, and OXPHOS components compared to the mean values of 512 controls.

478 (F) Cryo-EM structure (PDB id: 6VLZ) of mitoribosomal SSU with individual subunits  
479 colored according to their mean fold change values (of individuals F1:II-1 and F4:II-1)  
480 compared to the mean of 512 controls. Colors ranging from weakly reduced (blue) to  
481 strongly reduced (red) and two subunits (MRPS18C and MRPS38) in dark grey as no  
482 mean fold change values could be calculated. 12S ribosomal RNA is colored in yellow,  
483 *DAP3* is marked by a circle, and the small inset shows the relative position within the 55S  
484 ribosome.

485

486 As *DAP3* is a component of the small mitoribosomal subunit, we assessed if expression of

487 *MT-RNR1* and *MT-RNR2*, which encode 12S and 16S rRNA respectively, was altered in  
488 F1:II-1 and F4:II-1 fibroblasts compared to healthy controls. The subsequent 12S:16S  
489 ratios were calculated using *MT-RNR1* and *MT-RNR2* relative quantification values to  
490 highlight specific contextual alterations to the small mitoribosomal subunit. The 12S  
491 component of the 12S:16S ratio was significantly reduced in F1:II-1 and F4:II-1 cDNA  
492 compared to controls, with the DAP3 p.Glu392Lys variant producing the strongest effect  
493 on *MT-RNR1* expression ( $p = <0.0001$  (p.Glu392Lys;Glu392Lys) and 0.0019  
494 (p.Cys395Tyr;?)) (Figure 3B). These data indicate an impairment of mitoribosomal  
495 assembly.

496  
497 To assess whether *DAP3* variants influence levels of DAP3, mitoribosomal subunits, or  
498 other mitochondrial proteins, fibroblasts from F1:II-1 and F4:II-1 underwent proteomic  
499 analysis. The data were compared to a cohort of 512 individuals to visualize outliers.  
500 Interestingly, DAP3 was reduced to approximately 25% of mean levels in fibroblasts from  
501 both affected individuals, whilst also displaying the lowest DAP3 levels compared to any  
502 other individual in the dataset (Figure 3C). There was a remarkably consistent decrease in  
503 levels across all proteins constituting the small mitoribosomal subunit complex (Figure 3D)  
504 in fibroblasts from both affected individuals compared to the cohort, unless the protein was  
505 undetected in the mass spectrometry analysis (Table S10). When summing up the SSU  
506 and LSU overall, the two individuals with *DAP3* variants show the lowest SSU levels  
507 across the full cohort of samples, whilst the levels of LSU were not affected (Figure 3E).  
508 The analysis of mitochondrial respiratory chain complexes revealed a reduction of complex  
509 I and complex IV subunits in both affected individuals. Moreover, F4:II-1 also displayed a  
510 reduction in complex III. This reduction agrees with the enzymatic analysis and reflect the  
511 downstream consequences on the translation of mtDNA-encoded respiratory chain  
512 complex subunits. To visualize subunit protein abundance in the context of its 3D

513 structure, the data were mapped onto the Cryo-EM structure of the SSU (Figure 3F).  
514 Generally, proteins situated near DAP3 in the SSU are less abundant, with subcomplex  
515 formation more likely if situated on the opposite side to DAP3. These findings demonstrate  
516 independent evidence that *DAP3* variants impair assembly of the mitoribosomal SSU,  
517 impacting mitochondrial translation.  
518  
519 To assess whether disease-associated variants affect apoptosis, we cultured fibroblasts  
520 from F1:II-1 and F4:II-1 and challenged them with common effectors of intrinsic and  
521 extrinsic apoptosis pathways. We measured caspase-3 and caspase-7 activities with a  
522 commercial luminescence-based assay. Treatment with both staurosporine and TNF- $\alpha$  +  
523 cycloheximide significantly reduced caspase-3/7 release in affected individual fibroblasts  
524 compared to controls (Figure 4A). The fibroblasts from F4:II-1 exhibited a stronger  
525 apoptotic defect when challenged with intrinsic stimuli compared to the fibroblasts from  
526 F1:II-1. However, there were no significant differences between fibroblasts from affected  
527 individuals when treated with extrinsic stimuli.

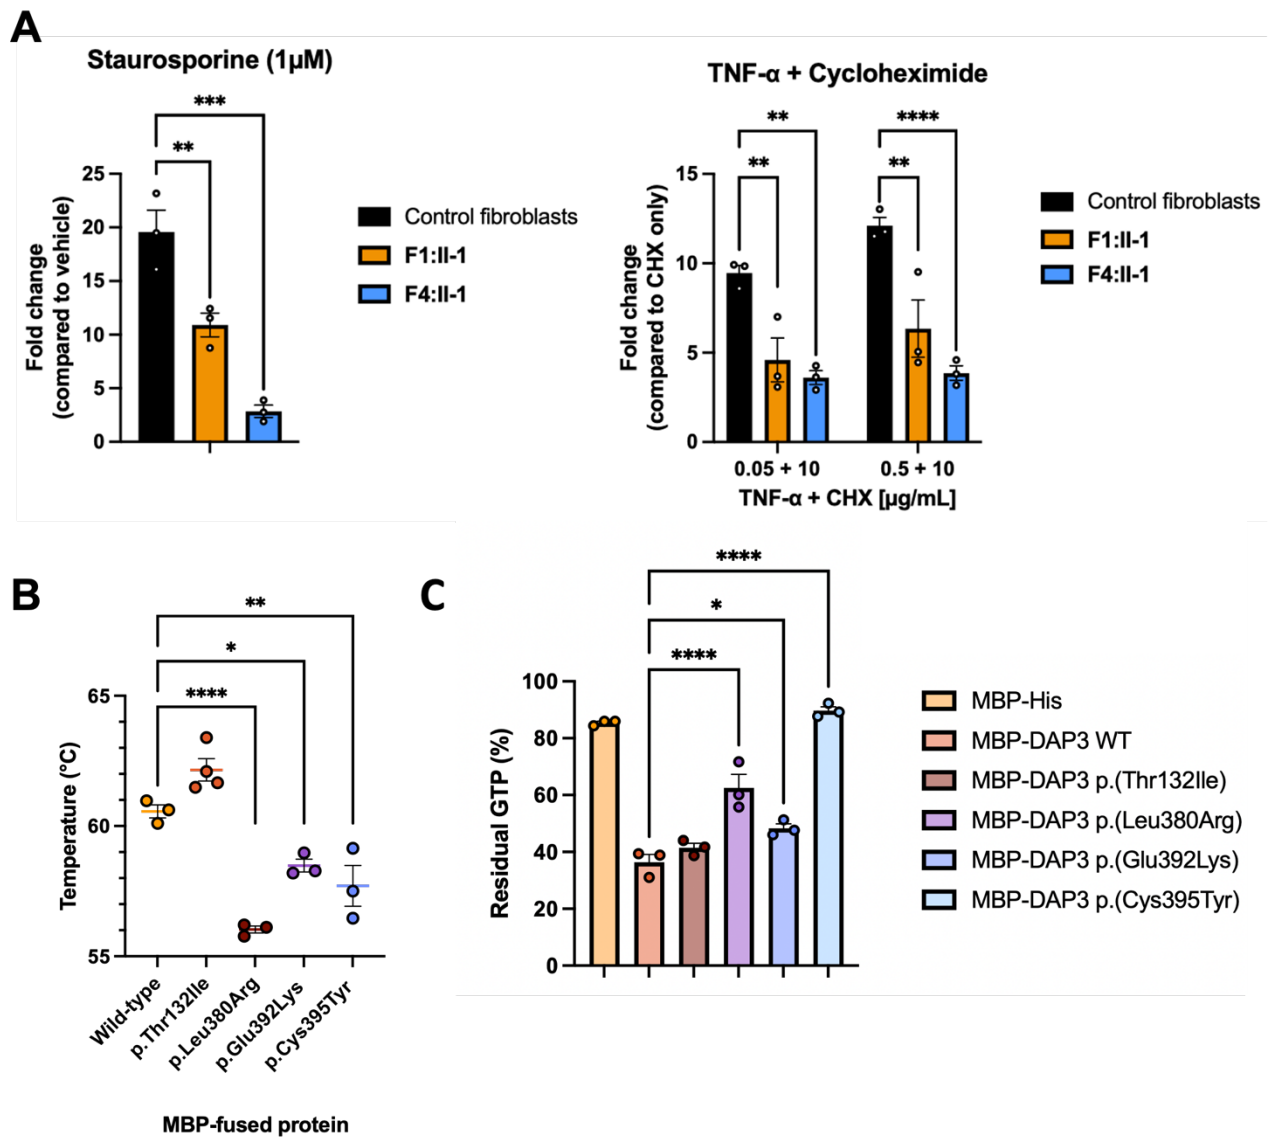

528

529 **Figure 4: Functional analysis of both affected individual fibroblasts and**  
 530 **recombinant DAP3 protein establish *DAP3* variants can diminish apoptotic**  
 531 **sensitivity and destabilize *DAP3* protein structure, impacting GTPase activity.**

532 (A) Assessment of caspase-3/7 release following stimulation of intrinsic and extrinsic  
 533 apoptotic pathways. Affected individual fibroblasts were challenged in duplicate with  
 534 staurosporine for 4.5 hours, or TNF- $\alpha$  + cycloheximide (CHX) for 24 hours before addition  
 535 of assay reagent. Data expressed as fold change in luminescence signal compared to  
 536 DMSO-treated or CHX-treated fibroblasts, with error bars representing SEM. N = 3, \*\*p <  
 537 0.01, \*\*\*p < 0.001, \*\*\*\*p < 0.0001, using one-way ANOVA with Dunnett's multiple  
 538 comparisons test (staurosporine) or two-way ANOVA with Dunnett's multiple comparisons

539 test (TNF- $\alpha$ ), comparing affected individual fibroblasts to control.

540 (B) Thermal stability of recombinant wild-type and variant MBP-DAP3 protein. Data points  
541 represent average  $T_m$  of triplicate reactions. Error bars represent SEM. N = 3-4, \* $p < 0.05$ ,  
542 \*\* $p < 0.01$ , \*\*\*\* $p < 0.0001$ , using one-way ANOVA with Dunnett's multiple comparisons  
543 test, comparing wild-type to variants.

544 (C) GTPase activity of recombinant wild-type and variant MBP-DAP3 protein. Data  
545 presented as mean luminescence produced by residual GTP, with error bars representing  
546 SEM. N = 3, \* $p < 0.05$ , \*\*\*\* $p < 0.0001$ , one-way ANOVA with Dunnett's multiple  
547 comparisons test, comparing wild-type protein activity to variants.

548 To investigate the effect of *DAP3* variants on protein stability, we generated recombinant  
549 wild-type and variant *DAP3* fused to maltose-binding protein (MBP). Thermal shift assay  
550 (TSA) and subsequent melt-curve analysis highlighted a significant  $T_m$  decrease in  
551 p.Leu380Arg, p.Glu392Lys and p.Cys395Tyr protein compared to wild-type (Figure 4B),  
552 indicating unfolding at lower temperatures and consequently reduced stability. Proteomic  
553 dissection of mitoribosomes indicated that *DAP3* is the only GTP-binding protein in the  
554 SSU, suggesting that it could initiate or play a key role in mitochondrial protein synthesis  
555 <sup>10,38</sup>. We hypothesized that *DAP3* variants could impair intrinsic GTPase activity, as  
556 disease-associated variants can impair *DAP3* stability. Firstly, wild-type MBP-*DAP3*  
557 exhibited GTPase activity *in vitro*. This GTPase activity was found to be significantly  
558 reduced with the *DAP3* p.Leu380Arg, p.Glu392Lys and p.Cys395Tyr variant protein ( $p =$   
559  $<0.0001$ , 0.0206 and  $<0.0001$  respectively), correlating with the TSA data (Figure 4C). The  
560 impact of these variants was variable, with a modest increase in residual GTP observed  
561 with p.Glu392Lys compared to wild-type. However, the p.Cys395Tyr variant increased  
562 residual GTP to the level observed with the negative control MBP-His, indicating low  
563 GTPase activity. Interestingly, there was no significant change in GTPase activity or  
564 thermal stability with p.Thr132Ile variant protein. These data suggest *DAP3* variants can

565 reduce protein stability, subsequently impairing ligand binding and GTPase activity.

566

567 To further confirm *DAP3* variant pathogenicity and specificity of their effect, we transduced  
568 fibroblasts from F1:II-1 and F4:II-1 with a lentiviral vector expressing wild-type *DAP3* to  
569 assess whether the mitoribosomal deficit could be rescued. *DAP3* mRNA expression  
570 increased in transduced cells, as expected (Figure 5A). Basal MRPS7 and MRPS9 levels  
571 were reduced in affected individuals, concordant with proteomic analysis. Following  
572 lentiviral transduction, immunoblotting also revealed a partial rescue of MRPS7 and  
573 MRPS9 protein levels in affected individual fibroblasts (Figure 5B), as well as in  
574 components of respiratory chain complex I (NDUFB8) and IV (COX II) (Figure 5C),  
575 changes which were not observed in transduced control fibroblasts.

**A**

**DAP3 mRNA expression**

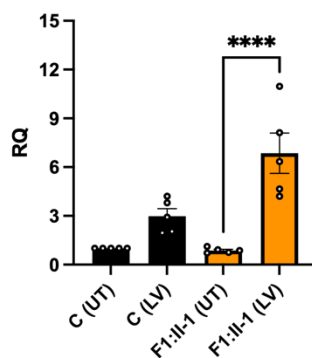

**B**

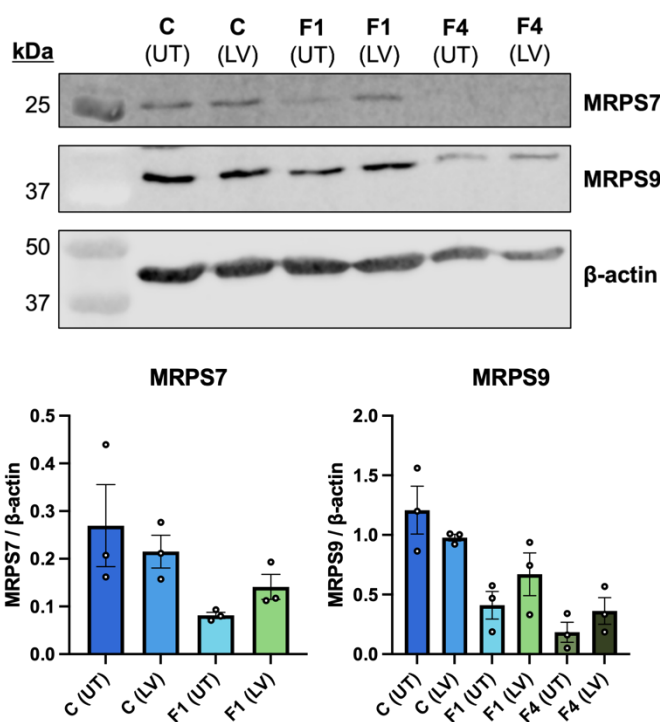

**C**

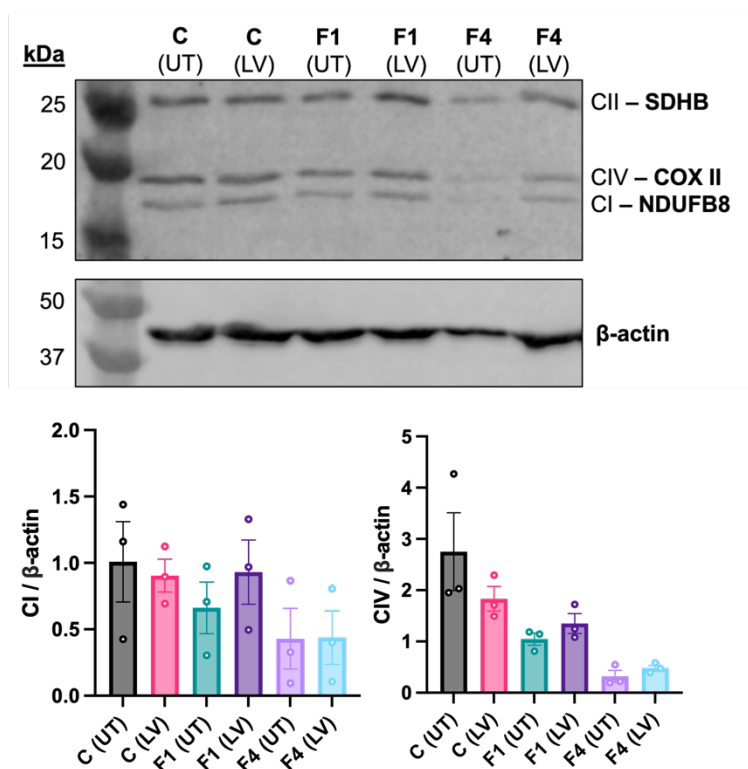

577 **Figure 5: Lentiviral transduction of wild-type *DAP3* increases protein levels of**  
578 **MRPS7, MRPS9 and OXPHOS components in F1:II-1 and F4:II-1 fibroblasts.**

579 (A) Expression of *DAP3* mRNA in control and fibroblasts from F1:II-1 after lentiviral  
580 transduction (LV) of *DAP3* cDNA for 72 hours, or untransduced (UT). Each datapoint  
581 represents an averaged RQ value from triplicate reactions, using cDNA from independent  
582 transductions. Error bars represent SEM. N = 5, \*\*\*\*p < 0.0001, one-way ANOVA with  
583 Tukey's multiple comparisons test.

584 (B) Protein levels of MRPS7 and MRPS9 in control fibroblasts and fibroblasts from F1:II-1  
585 and F4:II-1 after lentiviral transduction of *DAP3* cDNA for 72 hours. Beta-actin was used  
586 as a loading control and for densitometric analysis. Blots are representative of results from  
587 3 independent biological repeats. MRPS7 levels were unable to be quantified in fibroblasts  
588 from F4:II-1.

589 (C) Protein levels of SDHB, COX II and NDUFB8 in control fibroblasts and fibroblasts from  
590 F1:II-1 and F4:II-1 after lentiviral transduction of *DAP3* cDNA for 72 hours. Blots are  
591 representative of results from 3 independent biological repeats.

592

593 **Discussion**

594 Using a range of genetic, molecular and proteomic techniques, this study reveals that  
595 biallelic *DAP3* variants are associated with a Perrault syndrome-spectrum phenotype.  
596 Most known Perrault syndrome-associated genes encode mitochondrial proteins with key  
597 roles in mitochondrial translation, which is consistent with *DAP3* being a mitoribosomal  
598 SSU protein.

599 Phenotypes of individuals with *DAP3* disease-associated variants include a variety of  
600 features consistent with mitochondrial dysfunction, including lactic acidemia, neurological  
601 dysfunction, SNHL and POI, with variable expression (Table 1). Phenotypic severity  
602 ranges from classic Perrault syndrome, extending to childhood-onset neurological,



603 developmental and multisystem abnormalities. The affected individuals homozygous for  
604 the same missense variant p.(Glu392Lys) have markedly different phenotypic  
605 presentations, with F4:II-1 affected with neurological, renal and retinal presentations. The  
606 probands from F1 and F2 have phenotypes which are less severe than in family F4. Both  
607 individuals from F1 and F2 have a hemizygous *DAP3* missense variant *in trans* to a 135 kb  
608 deletion, consistent with complete loss of function of one allele.

609  
610 Diminished respiratory chain complex activities in fibroblasts from two affected individuals  
611 are consistent with a mitochondrial translation deficit (Figure 3A). Interestingly, the  
612 fibroblasts from F4:II-1 exhibited a more pronounced respiratory chain defect, with a clear  
613 reduction in both complex I and IV activities and diminished complex I:II ratios indicating a  
614 generalized disorder of mitochondrial translation. These data highlight that distinct *DAP3*  
615 variants have variable impacts on mitochondrial function.

616  
617 The mtDNA-encoded 12S and 16S rRNA are essential components of the mitoribosomal  
618 SSU and LSU, respectively. They enable protein-RNA and protein-protein interactions  
619 which are key requirements for mitoribosome assembly and integrity<sup>39</sup>. 12S:16S mRNA  
620 ratios have previously been evaluated to highlight specific discrepancies in mt-rRNA levels  
621<sup>40</sup>. 12S rRNA is associated with Perrault syndrome due to disease-associated variants in  
622 the rRNA chaperone ERAL1, which also interacts with *DAP3*<sup>40,41</sup>. *DAP3* is closely  
623 associated with the 12S rRNA, and when individual MRPS are diminished, 12S rRNA  
624 levels decline leading to SSU assembly defects<sup>17</sup>. We hypothesized that 12S rRNA levels  
625 could be reduced in fibroblasts from affected individuals as *DAP3* is assembled into the  
626 SSU at an early stage<sup>5</sup>, and disrupted *DAP3* function could lead to reduced mitoribosomal  
627 assembly and integrity. Indeed, 12S rRNA levels were significantly decreased in  
628 fibroblasts, whilst 16S rRNA levels were unchanged (Figure 3B).

629

630 Using sensitive quantitative proteomic profiling, biallelic *DAP3* variants were observed to  
631 confer a profile of mitochondrial ribosomal proteins typical for a SSU deficiency. Both  
632 fibroblasts from affected individuals demonstrated a clear, specific reduction in the levels  
633 of *DAP3*, but also all other SSU proteins, with all LSU proteins unaffected (Figure 3C-E).  
634 These data indicate that *DAP3* variants result in a specific impairment of SSU assembly.  
635 The loss of *DAP3* could result in failure to assemble the mitoribosomal SSU triggering  
636 degradation of the 12S rRNA and other MRPs that require *DAP3* or 12S rRNA as an  
637 assembly scaffold. The generalized decrease in SSU protein levels was more evident in  
638 fibroblasts from F4:II-1, consistent with her phenotypic severity. Proteomic profiles  
639 revealed the functional consequence of impaired assembly of mitoribosome as reduced  
640 mitochondrial translation of mtDNA encoded subunits of the respiratory chain complexes.  
641 Multiple respiratory chain complex proteins were reduced. Mainly complex I and IV mean  
642 protein abundance was affected in fibroblasts of both affected individuals, although  
643 complex III abundance was also reduced in F4:II-1, reflecting a more apparent generalized  
644 respiratory chain complex defect in this individual. The reduced respiratory chain complex  
645 activity of complex I and IV is consistent with other monogenic mitochondrial disorders  
646 <sup>42,43</sup>, and variants in other MRPs, including *MRPS2*, *MRPS34* and *MRPL24* which result in  
647 impaired mitoribosome assembly <sup>44-46</sup>. However, despite the common molecular effects,  
648 the clinical presentation of individuals with biallelic pathogenic variants in mitoribosomal  
649 proteins is heterogenous.

650

651 Interestingly, in the fibroblasts from F4:II-1, the largest reduction was observed in *MRPS7*  
652 levels. Variants in *MRPS7* have been associated with clinical features overlapping Perrault  
653 syndrome <sup>17,37</sup>. *DAP3* and *MRPS7* are predicted to interact extensively, including at  
654 Cys395 <sup>36</sup>, which may explain the shared phenotypic spectrum. Variants in the gene

655 encoding 12S rRNA are associated with sensorineural, non-syndromic deafness <sup>47</sup>,  
656 suggesting altered MRPS7 and 12S rRNA interactions due to their reduced abundance  
657 may account for the SNHL in individuals with variants in *DAP3*.

658  
659 We mapped protein mean fold change values seen with *DAP3* variants onto a Cryo-EM  
660 structure of the SSU to visualise SSU protein abundance within a structural context (Figure  
661 3F). Interestingly, subunit abundance does not always reflect its proximity to *DAP3*. For  
662 example, MRPS12 and MRPS15 levels were substantially decreased in both sets of  
663 fibroblasts. Both MRPS12 and MRPS15 are assemble late to the SSU and are distant from  
664 *DAP3*, yet both interact extensively with 12S rRNA <sup>5,48</sup>, which may reflect the importance  
665 of steady-state 12S levels for successful assembly and stability.

666  
667 Intriguingly, four SSU proteins (MRPS7, MRPS12, MRPS15, MRPS33) exhibited marked  
668 depletion, especially in fibroblasts from F4:II-1. The 392 residue is predicted to interact  
669 with ATP, a ligand which stabilizes *DAP3*, and two neighboring residues Ser389 and  
670 Arg393 also contact an unpaired base of the 12S rRNA which may also stabilize the  
671 mitoribosome <sup>49</sup>. This observation may indicate the *DAP3* p.(Glu392Lys) variant is more  
672 likely to induce structural defects that impair initial sub-complex assembly, and reduction in  
673 SSU proteins in this individual. Taken together, these data demonstrate *DAP3* variants  
674 effect a global reduction in SSU protein levels leading to impaired mitoribosome assembly  
675 and mitochondrial translation.

676  
677 Previous data has suggested multiple Perrault syndrome-associated genes are distinctly  
678 expressed within the spiral ganglion neurons of the cochlea, predicting variants could  
679 interfere with auditory signal transmission <sup>13</sup>. Mouse organ of Corti immunostaining did not  
680 suggest any obvious *DAP3* localization patterns to specific compartments of the inner ear

681 (Figure S3A), in contrast to Perrault syndrome associated PRORP which was localized to  
682 synapses and nerve fibers of hair cells<sup>50</sup>. Diffuse DAP3 cytoplasmic staining partially  
683 overlapping with mitochondrial marker TOM20 staining was observed before and after the  
684 onset of hearing in wild-type mice in some hair cells which sometimes appeared damaged  
685 with misshapen nuclei (Figure S3A). Exogenous overexpression shows increased  
686 mitochondrial localization in hair cells without cell damage (Figure S3B-C). These data  
687 imply DAP3 is present within the mouse inner ear at relatively low levels with no clear  
688 localization profile but might be upregulated in some stress conditions, indicating that  
689 SNHL in individuals with Perrault syndrome may have diverse gene specific etiologies.

690  
691 Treating fibroblasts from affected individuals with intrinsic and extrinsic apoptosis  
692 mediators revealed a decrease in apoptotic sensitivity compared to controls (Figure 4A).  
693 These data contrast with previous studies evaluating the role of DAP3 in apoptosis, which  
694 have described variable effects on extrinsic receptor-mediated cell death but no  
695 desensitizing effects reported via the intrinsic mitochondrial-mediated death mechanism  
696<sup>10,51</sup>. It is possible that DAP3 disease-associated variants or the subsequent reduction in  
697 DAP3 abundance could affect interactions with known mediators of the intrinsic apoptosis  
698 pathway, or cells damaged by impaired mitoribosome assembly could induce non-specific  
699 mechanisms that impair the ability of the cell to detect or stimulate components of the  
700 intrinsic apoptosis pathway. DAP3 has been proposed to act as an adapter protein for  
701 death-inducing signaling complexes involved in the extrinsic pathway, recruiting FADD to  
702 TRAIL receptors (DR4 and DR5) in a GTP-dependent manner which may be aided by  
703 DAP3-binding protein death ligand signal enhancer (DELE1)<sup>52,53</sup>. Diminished and  
704 unstable DAP3 protein can lead to reduced death receptor assembly, and subsequent  
705 signal transduction could explain the reduced sensitivity of fibroblasts from affected  
706 individuals to TNF- $\alpha$ .

707

708 Melt-curve analysis revealed *DAP3* variants p.Leu380Arg, p.Glu392Lys and p.Cys395Tyr  
709 exhibited significantly lower melting temperatures than wild-type, demonstrating these C-  
710 terminal variants destabilize *DAP3* (Figure 4B). These data broadly correlate with the  
711 GTPase results, indicating the decreased stability could impair ligand binding and  
712 indirectly interfere with subcomplex assembly and mitochondrial protein synthesis. The  
713 *DAP3* p.Leu380Arg variant conferred the most severe effect on thermal stability,  
714 consistent with the severe clinical phenotype. The p.Thr132Ile variant had no effect on  
715 thermal stability, so how this variant results in disease remains undetermined. However,  
716 residue 132 sits within the highly conserved Walker A motif [GxxxxGK(S/T)] which is  
717 necessary for ATP binding <sup>34</sup>.

718

719 Proteins with GTPase activity can act as molecular switches and regulate a series of cell  
720 signaling events, including mitoribosome assembly. Mitoribosome assembly GTPases,  
721 such as ERAL1 and GTP-binding protein 10 (GTPBP10), can participate as rRNA  
722 chaperones and assembly factors, as well as conducting rRNA modifications and subunit  
723 quality control <sup>54,55</sup>. *DAP3* is the only predicted GTPase of the mitoribosome <sup>38</sup>, but the  
724 functional extent of its putative GTPase activity is unclear. A recent structural study  
725 suggested that *DAP3* GTPase activity is independent of the translation cycle of the  
726 mitoribosome. However, GDP binding to *DAP3* was predicted to be required for efficient  
727 mitochondrial protein synthesis via enhanced stability of the *DAP3*  $\beta$ -hairpin at residues  
728 208-216 <sup>49</sup>, highlighting the importance of *DAP3* GDP binding to global mitoribosome  
729 function. We sought to understand if recombinant *DAP3* exhibited intrinsic GTPase  
730 activity, and if GTPase activity was affected by the disease-associated variants. *DAP3*  
731 variants p.Leu380Arg, p.Glu392Lys and p.Cys395Tyr significantly reduced GTPase  
732 activity, but *DAP3* p.Thr132Ile had no effect (Figure 4C). These *DAP3* residues are not

733 located close to the GDP binding region, which suggested reduced stability and improper  
734 folding may non-specifically destabilize the GDP binding pocket. Residual GTPase activity  
735 does not appear to correlate with phenotype severity, as the individual who is compound  
736 heterozygous for p.Cys395Tyr has the least severe clinical presentation. Specific variants  
737 such as DAP3 p.Cys395Tyr may also alter key DAP3 modifications such as farnesylation  
738 of the CAYL motif<sup>35</sup>. However, it is unclear if DAP3 is sufficiently prenylated *in vivo* for this  
739 modification to contribute to phenotypic variability<sup>38</sup>.

740

741 Rescue experiments were performed to further verify *DAP3* variant pathogenicity.  
742 Lentiviral transduction of wild-type *DAP3* increased *DAP3* mRNA expression (Figure 5A).  
743 Immunoblotting revealed transduction increased MRPS7 levels in fibroblasts from F1:II-1,  
744 and MRPS9 levels in fibroblasts from F1:II-1 and F4:II-1 compared to untransduced cells,  
745 but not to control fibroblast protein levels (Figure 5B). This trend was not observed in  
746 control fibroblasts. The levels of CI and CIV subunits, NDUFB8 and COXII, respectively  
747 were also partially rescued in transduced fibroblasts, particularly in F1:II-1 fibroblasts  
748 (Figure 5C). This indicates that a partial rescue of depleted mitoribosomal SSU proteins in  
749 affected individual fibroblasts may aid stability of the mitoribosomal SSU, thus partially  
750 restoring CI and CIV biogenesis. This effect has been observed in several functional  
751 studies confirming variant pathogenicity in other SSU-encoding genes, further confirming  
752 that mitoribosome destabilization is associated with various heterogenous mitochondrial  
753 disorders<sup>45,46,56,57</sup>. Collectively, these data indicate biallelic *DAP3* variants result in a  
754 Perrault syndrome spectrum phenotype, destabilizing the mitoribosome and impairment of  
755 mitochondrial translation.

756 Applying the ClinGen scoring criteria for gene-disease validity, we calculated a disease  
757 association score of 11 consistent with moderate evidence for disease association, which  
758 cannot be strengthened further without identification and characterization of additional

759 affected individuals<sup>58</sup>. However, the combined genetic, clinical and functional evidence  
760 outlined in this study provide confidence that biallelic *DAP3* variants are responsible for  
761 the described clinical presentations.

762

763 In summary, we have identified five independent families with biallelic variants in *DAP3*  
764 with a pleiotropic Perrault syndrome-associated phenotype, expanding the genetic  
765 heterogeneity of Perrault syndrome and further emphasizing the importance of  
766 mitochondrial translation in health and disease.

767

768

769

770

771

## 772 **Acknowledgements**

773 We thank the families for their participation. This study was supported by the Medical  
774 Research Council (MR/W019027/1 ROK, RWT and WGN), Action on Hearing Loss (S35  
775 Newman); Royal National Institute for the Deaf and Masonic Charitable Foundation  
776 (S60\_Newman); Action Medical Research (GN2494); NIHR Manchester Biomedical  
777 Research Centre ((IS-BRC-1215-20007 and NIHR203308); Infertility Research Trust;  
778 Wellcome Trust ISSF pump-prime award [097820/Z/11/B]; the Wellcome Trust Centre for  
779 Mitochondrial Research (203105/Z/16/Z to RWT); the UK NHS Highly Specialised “Rare  
780 Mitochondrial Disorders of Adults and Children” Service (RWT); and The Lily Foundation  
781 (RWT) through PhD studentship funding to RICG; DBT/Wellcome Trust India Alliance for  
782 the study, “Centre for Rare Disease Diagnosis, Research and Training”  
783 (IA/CRC/20/1/600002); in part by the Intramural Research Program of the NIDCD at the  
784 NIH (DC000039 to TBF). The DDD study presents independent research commissioned  
785 by the Health Innovation Challenge Fund [grant number HICF-1009-003], a parallel  
786 funding partnership between Wellcome and the Department of Health, and the Wellcome  
787 Sanger Institute [grant number WT098051]. The research team acknowledges the support  
788 of the National Institute for Health Research, through the Comprehensive Clinical  
789 Research Network. The views expressed in the paper are those of the authors and not  
790 necessarily those of the funders.

## 791 **Ethical approval**

792 All individuals or their guardians provided written informed consent in accordance with  
793 local regulations. Ethical approval for this study was granted by the National Health  
794 Service Ethics Committee (16/WA/0017) and University of Manchester. The NIH Animal  
795 Use Committee approved protocol 1263-15 to T.B.F. for murine studies.

796

## 797 **Author Contributions**



798 TS, RK, LAMD, AS, HBT, CB, KT, MO, RICG, EMJ, AJ, IAB, MB, JEU, JOS, SGW, SSB,  
799 AJB, SC, JME generated laboratory data. MS, SJ, GSC, AS, MY, PR, HA, ABC, MEB, HH  
800 and WGN contributed genetic and clinical data. TBS, RK, LAMD, CB, SB, WWY, KM, TBF,  
801 RWT, HP, ROK and WGN designed and supervised the experiments and analyzed the  
802 data. TBS, ROK, WGN drafted the paper. All authors reviewed and critically contributed to  
803 the paper.

804

### 805 **Declaration of interest**

806 The authors declare no competing interests.

807

### 808 **Web Resources**

809 dbSNP, <https://www.ncbi.nlm.nih.gov/projects/SNP/>

810 Ensembl Variant Effect Predictor (VEP),

811 <https://www.ensembl.org/info/docs/tools/vep/index.html>

812 Exome Variant Server, <http://evs.gs.washington.edu/EVS/>

813 GenBank. <https://www.ncbi.nlm.nih.gov/genbank/>

814 GeneMatcher, <https://genematcher.org/>

815 GTEEx, <https://gtexportal.org/home/>

816 gnomAD, <http://gnomad.broadinstitute.org/>

817 FoldX, <http://foldxsuite.crg.eu/>

818 LOVD, <https://www.lovd.nl/>

819 OMIM, <https://www.omim.org/>

820 MutationTaster, <http://www.mutationtaster.org/>

821 PolyPhen-2, <http://genetics.bwh.harvard.edu/pph2/>

822 SIFT, <http://sift.bii.a-star.edu.sg>

823

824 **Data and code availability**

825 The *DAP3* variants were submitted to ClinVar (<https://www.ncbi.nlm.nih.gov/clinvar/>)  
826 (GenBank: NM\_004632.4; accession numbers SCV004228990 – SCV004228993,  
827 VCV003066057.1).

828

829 **References**

- 830 1. Amunts A, Brown A, Toots J, Scheres SHW, Ramakrishnan V. The structure of the  
831 human mitochondrial ribosome. *Science*. 2015;348(6230):95-98.  
832 doi:10.1126/science.aaa1193
- 833 2. Greber BJ, Bieri P, Leibundgut M, Leitner A, Aebersold R, Boehringer D, Ban N.  
834 Ribosome. The complete structure of the 55S mammalian mitochondrial ribosome.  
835 *Science*. 2015;348(6232):303-308. doi:10.1126/science.aaa3872
- 836 3. Itoh Y, Andréll J, Choi A, Richter U, Maiti P, Best RB, Barrientos A, Battersby BJ,  
837 Amunts A. Mechanism of membrane-tethered mitochondrial protein synthesis.  
838 *Science*. 2021;371(6531):846-849. doi:10.1126/science.abe0763
- 839 4. Kummer E, Leibundgut M, Rackham O, Lee RG, Boehringer D, Filipovska A, Ban N.  
840 Unique features of mammalian mitochondrial translation initiation revealed by cryo-EM.  
841 *Nature*. 2018;560(7717):263-267. doi:10.1038/s41586-018-0373-y
- 842 5. Bogenhagen DF, Ostermeyer-Fay AG, Haley JD, Garcia-Diaz M. Kinetics and  
843 Mechanism of Mammalian Mitochondrial Ribosome Assembly. *Cell Rep*.  
844 2018;22(7):1935-1944. doi:10.1016/j.celrep.2018.01.066
- 845 6. Lopez Sanchez MIG, Krüger A, Shiriaev DI, Liu Y, Rorbach J. Human Mitoribosome  
846 Biogenesis and Its Emerging Links to Disease. *International Journal of Molecular*  
847 *Sciences*. 2021;22(8):3827. doi:10.3390/ijms22083827

- 848 7. Tang T, Zheng B, Chen S hong, Murphy AN, Kudlicka K, Zhou H, Farquhar MG.  
849 hNOA1 Interacts with Complex I and DAP3 and Regulates Mitochondrial Respiration  
850 and Apoptosis. *J Biol Chem*. 2009;284(8):5414-5424. doi:10.1074/jbc.M807797200
- 851 8. Kissil JL, Deiss LP, Bayewitch M, Raveh T, Khaspekov G, Kimchi A. Isolation of DAP3,  
852 a Novel Mediator of Interferon- $\gamma$ -induced Cell Death (\*). *Journal of Biological*  
853 *Chemistry*. 1995;270(46):27932-27936. doi:10.1074/jbc.270.46.27932
- 854 9. Kissil JL, Cohen O, Raveh T, Kimchi A. Structure-function analysis of an evolutionary  
855 conserved protein, DAP3, which mediates TNF-alpha- and Fas-induced cell death. *The*  
856 *EMBO Journal*. 1999;18(2):353. doi:10.1093/emboj/18.2.353
- 857 10. Xiao L, Xian H, Lee KY, Xiao B, Wang H, Yu F, Shen HM, Liou YC. Death-associated  
858 Protein 3 Regulates Mitochondrial-encoded Protein Synthesis and Mitochondrial  
859 Dynamics. *J Biol Chem*. 2015;290(41):24961-24974. doi:10.1074/jbc.M115.673343
- 860 11. Han J, An O, Ren X, Song Y, Tang SJ, Shen H, Ke X, Ng VHE, Tay DJT, Tan HQ, et  
861 al. Multilayered control of splicing regulatory networks by DAP3 leads to widespread  
862 alternative splicing changes in cancer. *Nat Commun*. 2022;13(1):1793.  
863 doi:10.1038/s41467-022-29400-7
- 864 12. Han J, An O, Hong H, Chan THM, Song Y, Shen H, Tang SJ, Lin JS, Ng VHE, Tay  
865 DJT, et al. Suppression of adenosine-to-inosine (A-to-I) RNA editome by death  
866 associated protein 3 (DAP3) promotes cancer progression. *Sci Adv*.  
867 2020;6(25):eaba5136. doi:10.1126/sciadv.aba5136
- 868 13. Faridi R, Rea A, Fenollar-Ferrer C, O'Keefe RT, Gu S, Munir Z, Khan AA, Riazuddin S,  
869 Hoa M, Naz S, et al. New insights into Perrault syndrome, a clinically and genetically  
870 heterogeneous disorder. *Hum Genet*. Published online August 2, 2021.  
871 doi:10.1007/s00439-021-02319-7

- 872 14. Newman WG, Friedman TB, Conway GS, Demain LA. Perrault Syndrome. Published  
873 online 2018:19.
- 874 15. Bakhshalizadeh S, Hock DH, Siddall NA, Kline BL, Sreenivasan R, Bell KM,  
875 Casagrande F, Kamalanathan S, Sahoo J, Narayanan N, et al. Deficiency of the  
876 mitochondrial ribosomal subunit, MRPL50, causes autosomal recessive syndromic  
877 premature ovarian insufficiency. *Hum Genet*. Published online May 6, 2023.  
878 doi:10.1007/s00439-023-02563-z
- 879 16. Demain L a. m., Antunes D, O'Sullivan J, Bhaskhar S s., O'Keefe R t., Newman W g. A  
880 known pathogenic variant in the essential mitochondrial translation gene RMND1  
881 causes a Perrault-like syndrome with renal defects. *Clinical Genetics*. 2018;94(2):276-  
882 277. doi:10.1111/cge.13255
- 883 17. Menezes MJ, Guo Y, Zhang J, Riley LG, Cooper ST, Thorburn DR, Li J, Dong D, Li Z,  
884 Glessner J, et al. Mutation in mitochondrial ribosomal protein S7 (MRPS7) causes  
885 congenital sensorineural deafness, progressive hepatic and renal failure and lactic  
886 acidemia. *Hum Mol Genet*. 2015;24(8):2297-2307. doi:10.1093/hmg/ddu747
- 887 18. Tucker EJ, Rius R, Jaillard S, Bell K, Lamont PJ, Travessa A, Dupont J, Sampaio L,  
888 Dulon J, Vuillaumier-Barrot S, et al. Genomic sequencing highlights the diverse  
889 molecular causes of Perrault syndrome: a peroxisomal disorder (PEX6), metabolic  
890 disorders (CLPP, GGPS1), and mtDNA maintenance/translation disorders (LARS2,  
891 TFAM). *Hum Genet*. 2020;139(10):1325-1343. doi:10.1007/s00439-020-02176-w
- 892 19. Faridi R, Rehman AU, Morell RJ, Friedman PL, Demain L, Zahra S, Khan AA, Tohlob  
893 D, Assir MZ, Beaman G, et al. Mutations of SGO2 and CLDN14 collectively cause  
894 coincidental Perrault syndrome. *Clin Genet*. 2017;91(2):328-332.  
895 doi:10.1111/cge.12867

- 896 20. Sobreira N, Schiettecatte F, Valle D, Hamosh A. GeneMatcher: a matching tool for  
897 connecting investigators with an interest in the same gene. *Hum Mutat.*  
898 2015;36(10):928-930. doi:10.1002/humu.22844
- 899 21. Wright CF, Fitzgerald TW, Jones WD, Clayton S, McRae JF, van Kogelenberg M, King  
900 DA, Ambridge K, Barrett DM, Bayzetenova T, et al. Genetic diagnosis of developmental  
901 disorders in the DDD study: a scalable analysis of genome-wide research data. *Lancet.*  
902 2015;385(9975):1305-1314. doi:10.1016/S0140-6736(14)61705-0
- 903 22. Smith MJ, Beetz C, Williams SG, Bhaskar SS, O'Sullivan J, Anderson B, Daly SB,  
904 Urquhart JE, Bholah Z, Oudit D, et al. Germline mutations in SUFU cause Gorlin  
905 syndrome-associated childhood medulloblastoma and redefine the risk associated with  
906 PTCH1 mutations. *J Clin Oncol.* 2014;32(36):4155-4161.  
907 doi:10.1200/JCO.2014.58.2569
- 908 23. Bauer P, Kandaswamy KK, Weiss MER, Paknia O, Werber M, Bertoli-Avella AM,  
909 Yüksel Z, Bochinska M, Oprea GE, Kishore S, et al. Development of an evidence-  
910 based algorithm that optimizes sensitivity and specificity in ES-based diagnostics of a  
911 clinically heterogeneous patient population. *Genet Med.* 2019;21(1):53-61.  
912 doi:10.1038/s41436-018-0016-6
- 913 24. Zech M, Kopajtich R, Steinbrücker K, Bris C, Gueguen N, Feichtinger RG, Achleitner  
914 MT, Duzkale N, Périvier M, Koch J, et al. Variants in Mitochondrial ATP Synthase  
915 Cause Variable Neurologic Phenotypes. *Ann Neurol.* 2022;91(2):225-237.  
916 doi:10.1002/ana.26293
- 917 25. Ellingford JM, Campbell C, Barton S, Bhaskar S, Gupta S, Taylor RL, Sergouniotis PI,  
918 Horn B, Lamb JA, Michaelides M, et al. Validation of copy number variation analysis for

- 919 next-generation sequencing diagnostics. *Eur J Hum Genet.* 2017;25(6):719-724.  
920 doi:10.1038/ejhg.2017.42
- 921 26. Plagnol V, Curtis J, Epstein M, Mok KY, Stebbings E, Grigoriadou S, Wood NW,  
922 Hambleton S, Burns SO, Thrasher AJ, et al. A robust model for read count data in  
923 exome sequencing experiments and implications for copy number variant calling.  
924 *Bioinformatics.* 2012;28(21):2747-2754. doi:10.1093/bioinformatics/bts526
- 925 27. Frazier AE, Vincent AE, Turnbull DM, Thorburn DR, Taylor RW. Assessment of  
926 mitochondrial respiratory chain enzymes in cells and tissues. *Methods Cell Biol.*  
927 2020;155:121-156. doi:10.1016/bs.mcb.2019.11.007
- 928 28. Kopajtich R, Smirnov D, Stenton SL, Loipfinger S, Meng C, Scheller IF, Freisinger P,  
929 Baski R, Berutti R, Behr J, et al. Integration of proteomics with genomics and  
930 transcriptomics increases the diagnostic rate of Mendelian disorders. Published online  
931 July 3, 2021:2021.03.09.21253187. doi:10.1101/2021.03.09.21253187
- 932 29. Belyantseva IA. Helios® Gene Gun-Mediated Transfection of the Inner Ear Sensory  
933 Epithelium: Recent Updates. In: Sokolowski B, ed. *Auditory and Vestibular Research:  
934 Methods and Protocols.* Springer; 2016:3-26. doi:10.1007/978-1-4939-3615-1\_1
- 935 30. Yariv B, Yariv E, Kessel A, Masrati G, Chorin AB, Martz E, Mayrose I, Pupko T, Ben-  
936 Tal N. Using evolutionary data to make sense of macromolecules with a “face-lifted”  
937 ConSurf. *Protein Sci.* 2023;32(3):e4582. doi:10.1002/pro.4582
- 938 31. Gudmundsson S, Singer-Berk M, Stenton SL, Goodrich JK, Wilson MW, Einson J,  
939 Watts NA, Consortium GAD, Lappalainen T, Rehm HL, et al. Exploring penetrance of  
940 clinically relevant variants in over 800,000 humans from the Genome Aggregation  
941 Database. Published online June 13, 2024:2024.06.12.593113.  
942 doi:10.1101/2024.06.12.593113

- 943 32. Waterhouse AM, Procter JB, Martin DMA, Clamp M, Barton GJ. Jalview Version 2—a  
944 multiple sequence alignment editor and analysis workbench. *Bioinformatics*.  
945 2009;25(9):1189-1191. doi:10.1093/bioinformatics/btp033
- 946 33. Itoh Y, Singh V, Khawaja A, Naschberger A, Nguyen MD, Rorbach J, Amunts A.  
947 Structure of the mitoribosomal small subunit with streptomycin reveals Fe-S clusters  
948 and physiological molecules. Cate JH, Ron D, Croll TI, eds. *eLife*. 2022;11:e77460.  
949 doi:10.7554/eLife.77460
- 950 34. Saraste M, Sibbald PR, Wittinghofer A. The P-loop — a common motif in ATP- and  
951 GTP-binding proteins. *Trends in Biochemical Sciences*. 1990;15(11):430-434.  
952 doi:10.1016/0968-0004(90)90281-F
- 953 35. Sang Y, Yang Q, Guo Y, Liu X, Shen D, Jiang C, Wang X, Li K, Wang H, Yang C, et al.  
954 Oocytes orchestrate protein prenylation for mitochondrial function through selective  
955 inactivation of cholesterol biosynthesis in murine species. *J Biol Chem*.  
956 2023;299(10):105183. doi:10.1016/j.jbc.2023.105183
- 957 36. Khawaja A, Itoh Y, Remes C, Spåhr H, Yukhnovets O, Höfig H, Amunts A, Rorbach J.  
958 Distinct pre-initiation steps in human mitochondrial translation. *Nat Commun*.  
959 2020;11(1):2932. doi:10.1038/s41467-020-16503-2
- 960 37. Kline BL, Jaillard S, Bell KM, Bakhshalizadeh S, Robevska G, van den Bergen J,  
961 Dulon J, Ayers KL, Christodoulou J, Tchan MC, et al. Integral Role of the Mitochondrial  
962 Ribosome in Supporting Ovarian Function: MRPS7 Variants in Syndromic Premature  
963 Ovarian Insufficiency. *Genes (Basel)*. 2022;13(11):2113. doi:10.3390/genes13112113
- 964 38. Koc EC, Ranasinghe A, Burkhart W, Blackburn K, Koc H, Moseley A, Spremulli LL. A  
965 new face on apoptosis: death-associated protein 3 and PDCD9 are mitochondrial

- 966 ribosomal proteins. *FEBS Letters*. 2001;492(1-2):166-170. doi:10.1016/S0014-  
967 5793(01)02250-5
- 968 39. Bohnsack MT, Sloan KE. The mitochondrial epitranscriptome: the roles of RNA  
969 modifications in mitochondrial translation and human disease. *Cellular and Molecular*  
970 *Life Sciences*. 2018;75(2):241. doi:10.1007/s00018-017-2598-6
- 971 40. Chatzisprou IA, Alders M, Guerrero-Castillo S, Zapata Perez R, Haagmans MA,  
972 Mouchiroud L, Koster J, Ofman R, Baas F, Waterham HR, et al. A homozygous  
973 missense mutation in ERAL1, encoding a mitochondrial rRNA chaperone, causes  
974 Perrault syndrome. *Hum Mol Genet*. 2017;26(13):2541-2550. doi:10.1093/hmg/ddx152
- 975 41. Dennerlein S, Rozanska A, Wydro M, Chrzanowska-Lightowlers ZMA, Lightowlers RN.  
976 Human ERAL1 is a mitochondrial RNA chaperone involved in the assembly of the 28S  
977 small mitochondrial ribosomal subunit. *Biochem J*. 2010;430(Pt 3):551-558.  
978 doi:10.1042/BJ20100757
- 979 42. Invernizzi F, Legati A, Nasca A, Lamantea E, Garavaglia B, Gusic M, Kopajtich R,  
980 Prokisch H, Zeviani M, Lamperti C, et al. Myopathic mitochondrial DNA depletion  
981 syndrome associated with biallelic variants in LIG3. *Brain*. 2021;144(9):e74.  
982 doi:10.1093/brain/awab238
- 983 43. van der Ven AT, Cabrera-Orefice A, Wente I, Feichtinger RG, Tsiakas K, Weiss D,  
984 Bierhals T, Scholle L, Prokisch H, Kopajtich R, et al. Expanding the phenotypic and  
985 biochemical spectrum of NDUFAF3-related mitochondrial disease. *Molecular Genetics*  
986 *and Metabolism*. 2023;140(3):107675. doi:10.1016/j.ymgme.2023.107675
- 987 44. Di Nottia M, Marchese M, Verrigni D, Mutti CD, Torraco A, Oliva R, Fernandez-Vizarra  
988 E, Morani F, Trani G, Rizza T, et al. A homozygous MRPL24 mutation causes a



- 989 complex movement disorder and affects the mitoribosome assembly. *Neurobiology of*  
990 *Disease*. 2020;141:104880. doi:10.1016/j.nbd.2020.104880
- 991 45. Gardeitchik T, Mohamed M, Ruzzenente B, Karall D, Guerrero-Castillo S, Dalloyaux D,  
992 van den Brand M, van Kraaij S, van Asbeck E, Assouline Z, et al. Bi-allelic Mutations in  
993 the Mitochondrial Ribosomal Protein MRPS2 Cause Sensorineural Hearing Loss,  
994 Hypoglycemia, and Multiple OXPHOS Complex Deficiencies. *Am J Hum Genet*.  
995 2018;102(4):685-695. doi:10.1016/j.ajhg.2018.02.012
- 996 46. Lake NJ, Webb BD, Stroud DA, Richman TR, Ruzzenente B, Compton AG, Mountford  
997 HS, Pulman J, Zangarelli C, Rio M, et al. Biallelic Mutations in MRPS34 Lead to  
998 Instability of the Small Mitoribosomal Subunit and Leigh Syndrome. *Am J Hum Genet*.  
999 2017;101(2):239-254. doi:10.1016/j.ajhg.2017.07.005
- 1000 47. Prezant TR, Agapian JV, Bohlman MC, Bu X, Öztas S, Qiu WQ, Arnos KS, Cortopassi  
1001 GA, Jaber L, Rotter JI, et al. Mitochondrial ribosomal RNA mutation associated with  
1002 both antibiotic-induced and non-syndromic deafness. *Nat Genet*. 1993;4(3):289-294.  
1003 doi:10.1038/ng0793-289
- 1004 48. Ferrari A, Del'Olio S, Barrientos A. The Diseased Mitoribosome. *FEBS Letters*.  
1005 2021;595(8):1025-1061. doi:10.1002/1873-3468.14024
- 1006 49. Singh V, Itoh Y, Del'Olio S, Hassan A, Naschberger A, Flygaard RK, Nobe Y,  
1007 Izumikawa K, Aibara S, Andréll J, et al. Structure of mitoribosome reveals mechanism  
1008 of mRNA binding, tRNA interactions with L1 stalk, roles of cofactors and rRNA  
1009 modifications. *bioRxiv*. Published online July 15, 2023:2023.05.24.542018.  
1010 doi:10.1101/2023.05.24.542018
- 1011 50. Hochberg I, Demain LAM, Richer J, Thompson K, Urquhart JE, Rea A, Pagarkar W,  
1012 Rodríguez-Palmero A, Schlüter A, Verdura E, et al. Bi-allelic variants in the

- 1013 mitochondrial RNase P subunit PRORP cause mitochondrial tRNA processing defects  
1014 and pleiotropic multisystem presentations. *The American Journal of Human Genetics*.  
1015 Published online October 2021:S0002929721003797. doi:10.1016/j.ajhg.2021.10.002
- 1016 51. Kim HR, Chae HJ, Thomas M, Miyazaki T, Monosov A, Monosov E, Krajewska M,  
1017 Krajewski S, Reed JC. Mammalian dap3 is an essential gene required for  
1018 mitochondrial homeostasis in vivo and contributing to the extrinsic pathway for  
1019 apoptosis. *The FASEB Journal*. 2007;21(1):188-196. doi:10.1096/fj.06-6283com
- 1020 52. Harada T, Iwai A, Miyazaki T. Identification of DELE, a novel DAP3-binding protein  
1021 which is crucial for death receptor-mediated apoptosis induction. *Apoptosis*.  
1022 2010;15(10):1247-1255. doi:10.1007/s10495-010-0519-3
- 1023 53. Miyazaki T, Reed JC. A GTP-binding adapter protein couples TRAIL receptors to  
1024 apoptosis-inducing proteins. *Nat Immunol*. 2001;2(6):493-500. doi:10.1038/88684
- 1025 54. Maiti P, Kim HJ, Tu YT, Barrientos A. Human GTPBP10 is required for mitoribosome  
1026 maturation. *Nucleic Acids Research*. 2018;46(21):11423-11437.  
1027 doi:10.1093/nar/gky938
- 1028 55. Maiti P, Lavdovskaia E, Barrientos A, Richter-Dennerlein R. Role of GTPases in driving  
1029 mitoribosome assembly. *Trends Cell Biol*. 2021;31(4):284-297.  
1030 doi:10.1016/j.tcb.2020.12.008
- 1031 56. Bugiardini E, Mitchell AL, Rosa ID, Horning-Do HT, Pitmann AM, Poole OV, Holton JL,  
1032 Shah S, Woodward C, Hargreaves I, et al. MRPS25 mutations impair mitochondrial  
1033 translation and cause encephalomyopathy. *Hum Mol Genet*. 2019;28(16):2711-2719.  
1034 doi:10.1093/hmg/ddz093

- 1035 57. Jackson CB, Huemer M, Bolognini R, Martin F, Szinnai G, Donner BC, Richter U,  
1036 Battersby BJ, Nuoffer JM, Suomalainen A, et al. A variant in MRPS14 (uS14m) causes  
1037 perinatal hypertrophic cardiomyopathy with neonatal lactic acidosis, growth retardation,  
1038 dysmorphic features and neurological involvement. *Hum Mol Genet.* 2019;28(4):639-  
1039 649. doi:10.1093/hmg/ddy374
- 1040 58. Rehm HL, Berg JS, Brooks LD, Bustamante CD, Evans JP, Landrum MJ, Ledbetter  
1041 DH, Maglott DR, Martin CL, Nussbaum RL, et al. ClinGen--the Clinical Genome  
1042 Resource. *N Engl J Med.* 2015;372(23):2235-2242. doi:10.1056/NEJMs1406261
- 1043
